# Supplementary material for: Synthesis of bicyclic 2-pyridones by regioselective annulations of heterocyclic ketene aminals with anhydrides
Source: Royal Society of Chemistry journal article supplement (doi:10.1039/c6ra23451h), 2016-01-01
Supplement: c6ra23451h1.pdf [file c6ra23451h1.pdf]

# Efficient synthesis of substituted bicyclic 2-pyridones by regioselective annulations of heterocyclic ketene amins with methacrylic anhydride or crotonic anhydride

Jin Liu, Sheng-Jiao Yan\*, Zheng-Mao Cao Shi-Sheng Cui and Jun Lin\*

Key Laboratory of Medicinal Chemistry for Natural Resource (Yunnan University), Ministry Education, School of Chemical Science and Technology, Yunnan University, Kunming, 650091, P. R. China. E-mail: [yansj@ynu.edu.cn](mailto:yansj@ynu.edu.cn); [linjun@ynu.edu.cn](mailto:linjun@ynu.edu.cn); Tel & Fax: +86 871 65031633.

## Supporting Information

### Table of Contents

|                                                                                          |    |
|------------------------------------------------------------------------------------------|----|
| General information .....                                                                | 2  |
| Procedure for synthesis of compound <b>3</b> .....                                       | 2  |
| Spectroscopic data of bicyclic pyridones derivatives <b>3</b> .....                      | 2  |
| General procedure for the synthesis of bicyclic pyridones derivatives <b>4–5</b> .....   | 3  |
| Spectroscopic data of bicyclic pyridones derivatives <b>4–5</b> .....                    | 3  |
| General procedure for the synthesis of compounds <b>6</b> .....                          | 13 |
| Spectroscopic data of bicyclic pyridones derivatives <b>6</b> .....                      | 13 |
| X-ray Structure and Data of <b>4j</b> .....                                              | 15 |
| <sup>1</sup> H NMR and <sup>13</sup> C NMR spectra for compound <b>3</b> .....           | 19 |
| <sup>1</sup> H NMR and <sup>13</sup> C NMR spectra for bicyclic pyridones <b>4</b> ..... | 20 |
| <sup>1</sup> H NMR and <sup>13</sup> C NMR spectra for bicyclic pyridones <b>5</b> ..... | 34 |
| <sup>1</sup> H NMR and <sup>13</sup> C NMR spectra for bicyclic pyridones <b>6</b> ..... | 46 |
| References .....                                                                         | 50 |

## General information

All compounds were fully characterized by spectroscopic data. The NMR spectra were recorded on a Bruker Ascend III 600 or DRX500 ( $^1\text{H}$ : 600 or 500 MHz,  $^{13}\text{C}$ : 150 or 125 MHz). Chemical shifts ( $\delta$ ) are expressed in ppm and  $J$  values are given in Hz. Deuterated  $\text{CDCl}_3$  and  $\text{DMSO-}d_6$  were used as solvent. IR spectra were recorded on a FT-IR Thermo Nicolet Avatar 360 using a KBr pellet. The reactions were monitored by thin layer chromatography (TLC) using silica gel GF254. The melting points were determined on a XT-4A melting point apparatus and are uncorrected. HRMs were performed on an Agilent LC/Msd TOF instrument. Unless otherwise stated, all reagents used are commercially available. Solvents for reactions were purified by standard procedures. Compounds **1a–1n** were prepared according to the literature.<sup>1</sup> Materials **1o–1p** were synthesized according with the literature.<sup>2</sup>

### Procedure for synthesis of compound 3

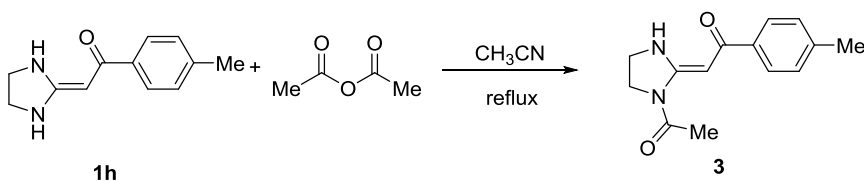

HKA **1h** (1.0 mmol), acetic anhydride (1.2 mmol) and dry  $\text{CH}_3\text{CN}$  (10 mL) were placed in a 25 mL round-bottom flask and trimethylamine (10 mmol%) was added and the mixture was stirred at reflux for 20 minutes. Upon completion, as monitored by TLC. Then the reaction mixture was cooled to room temperature and filtered to give the pure crude product, which was further washed with petroleum ether-EtOAc(1:1) to give pure product **3** with a yield of 94%.

### Spectroscopic data of bicyclic pyridones derivatives 3

#### **2-(1-Acetylimidazolidin-2-ylidene)-1-(p-tolyl)ethan-1-one (3)**

White solid: mp 207–208°C; IR (KBr): 3449, 3168, 2091, 1691, 1604, 1496, 1391, 1310, 1256, 767  $\text{cm}^{-1}$ ;  $^1\text{H}$  NMR (500 MHz,  $\text{DMSO-}d_6$ ):  $\delta$  = 10.21 (br, 1H, NH), 7.68 (d,  $J$  = 8.0 Hz, 2H, PhH), 7.25 (d,  $J$  = 7.9 Hz, 2H, PhH), 6.86 (s, 1H, C=CH), 4.03–3.63 (m, 4H,  $\text{NCH}_2\text{CH}_2$ ), 2.34 (s, 3H,  $\text{CH}_3$ ), 2.24 (s, 3H,  $\text{CH}_3$ );  $^{13}\text{C}$  NMR (125 MHz,  $\text{DMSO-}d_6$ ):  $\delta$  = 186.6, 170.2, 158.6, 140.7, 138.1, 129.2, 126.9, 79.0, 45.8, 42.0, 25.5, 21.3; HRMS (ESI)  $m/z$  calcd for  $\text{C}_{14}\text{H}_{17}\text{N}_2\text{O}_2$   $[\text{M}+\text{H}]^+$ , 245.1285; found, 245.1284.

## General procedure for the synthesis of bicyclic pyridones derivatives 4-5

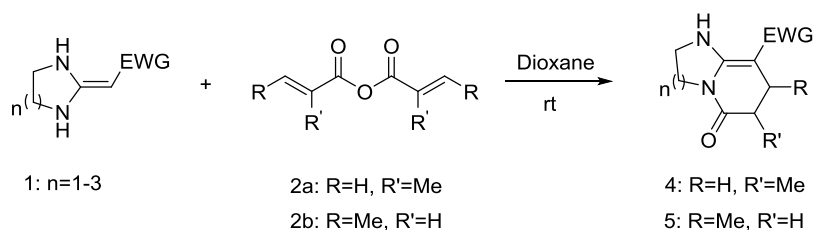

HKA derivatives **1** (1.0 mmol) was added to a 25 mL round-bottom flask and dissolved in dry dioxane (10.0 mL). Methacrylic anhydride **2a** or crotonic anhydride **2b** (1.2 mmol) was added under stirring at room temperature, the mixture was stirred until TLC revealed that the conversion of the starting material was complete about 0.5-6 h. a small amount of H<sub>2</sub>O (ca. 10 ml) was added and mixture was extracted with EtOAc (25 mL × 3). The combined organic extracts were dried over anhydrous Na<sub>2</sub>SO<sub>4</sub> and evaporated *in vacuo*. The crude residue was dried and recrystallized from petroleum ether-EtOAc to afford the pure products **4-5** with a yield of 83-96%.

### Spectroscopic data of bicyclic pyridones derivatives 4-5

**7-Methyl-9-(4-methylbenzoyl)-1,2,3,4,7,8-hexahydro-6H-pyrido[1,2-a]pyrimidin-6-one (4a).**

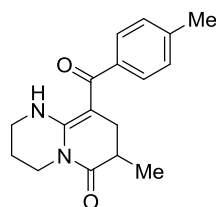

White solid: mp 157–158 °C; IR (KBr): 3423, 2967, 2815, 1695, 1605, 1575, 1241, 1155, 746 cm<sup>-1</sup>; <sup>1</sup>H NMR (600 MHz, DMSO-*d*<sub>6</sub>): δ = 12.62 (br, 1H, NH), 7.23–7.22 (m, 2H, PhH), 7.19–7.17 (m, 2H, PhH), 3.84–3.56 (m, 2H, NCH<sub>2</sub>), 3.44–3.36 (m, 2H, NCH<sub>2</sub>), 3.48–3.44 (m, 2H, CH<sub>2</sub>), 2.32 (s, 3H, CH<sub>3</sub>), 2.31–2.26 (m, H, CH), 1.95–1.88 (m, 2H, CH<sub>2</sub>), 1.03–1.02 (m, 3H, CH<sub>3</sub>); <sup>13</sup>C NMR (150 MHz, DMSO-*d*<sub>6</sub>): δ = 187.3, 173.2, 156.5, 140.0, 138.3, 128.8, 127.2, 86.6, 39.6, 38.4, 30.0, 21.3, 20.7, 15.6; HRMS (ESI) *m/z* calcd for C<sub>17</sub>H<sub>21</sub>N<sub>2</sub>O<sub>2</sub> [M+H]<sup>+</sup>, 285.1598; found, 285.1598.

**9-(4-Methoxybenzoyl)-7-methyl-1,2,3,4,7,8-hexahydro-6H-pyrido[1,2-a]pyrimidin-6-one (4b)**

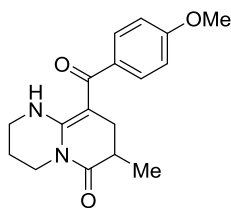

White solid: mp 178–179 °C; IR (KBr): 3553, 3415, 2968, 1686, 1601, 1451, 1274, 1153, 837, 603  $\text{cm}^{-1}$ ;  $^1\text{H}$  NMR (600 MHz,  $\text{DMSO-}d_6$ ):  $\delta$  = 12.63 (br, 1H, NH), 7.31 (d,  $J$  = 8.6 Hz, 2H, PhH), 6.93 (d,  $J$  = 8.6 Hz, 2H, PhH), 3.85–3.57 (m, 2H,  $\text{NCH}_2$ ), 3.78 (s, 3H,  $\text{OCH}_3$ ), 3.42–3.33 (m, 2H,  $\text{NCH}_2$ ), 2.51–2.50 (m, H, CH), 2.49–2.36 (m, 2H,  $\text{CH}_2$ ), 1.94–1.89 (m, 2H,  $\text{CH}_2$ ), 1.05–1.04 (m, 3H,  $\text{CH}_3$ );  $^{13}\text{C}$  NMR (150 MHz,  $\text{DMSO-}d_6$ ):  $\delta$  = 186.9, 173.1, 159.9, 156.4, 135.1, 129.0, 113.6, 86.6, 55.6, 39.9, 38.4, 36.3, 30.2, 20.7, 16.6; HRMS (ESI)  $m/z$  calcd for  $\text{C}_{17}\text{H}_{21}\text{N}_2\text{O}_3$   $[\text{M}+\text{H}]^+$ , 301.1547; found, 301.1547.

**9-(4-Chlorobenzoyl)-7-methyl-1,2,3,4,7,8-hexahydro-6H-pyrido[1,2-*a*]pyrimidin-6-one (4c).**

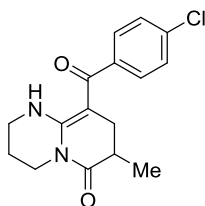

White solid: mp 135–136 °C; IR (KBr): 3439, 2966, 1698, 1612, 1542, 1402, 1241, 1177, 841  $\text{cm}^{-1}$ ;  $^1\text{H}$  NMR (600 MHz,  $\text{DMSO-}d_6$ ):  $\delta$  = 12.58 (br, 1H, NH), 7.45 (d,  $J$  = 8.3 Hz, 2H, PhH), 7.36 (d,  $J$  = 8.3 Hz, 2H, PhH), 3.83–3.44 (m, 2H,  $\text{NCH}_2$ ), 3.38–3.36 (m, 2H,  $\text{NCH}_2$ ), 2.50–2.39 (m, 2H,  $\text{CH}_2$ ), 2.31–2.26 (m, H, CH), 1.95–1.90 (m, 2H,  $\text{CH}_2$ ), 1.05–1.03 (m, 3H,  $\text{CH}_3$ );  $^{13}\text{C}$  NMR (150 MHz,  $\text{DMSO-}d_6$ ):  $\delta$  = 185.6, 173.1, 156.8, 141.4, 133.4, 129.2, 128.4, 86.7, 39.6, 38.4, 36.3, 29.8, 20.5, 15.6; HRMS (ESI)  $m/z$  calcd for  $\text{C}_{16}\text{H}_{18}\text{ClN}_2\text{O}_2$   $[\text{M}+\text{H}]^+$ , 305.1051; found, 305.1052.

**9-(4-Fluorobenzoyl)-7-methyl-1,2,3,4,7,8-hexahydro-6H-pyrido[1,2-*a*]pyrimidin-6-one (4d).**

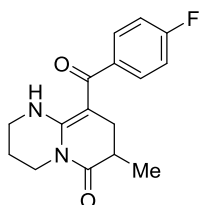

Light yellow solid: mp 157–158 °C; IR (KBr): 3450, 3073, 2974, 1698, 1654, 1535, 1241, 1158, 847, 600  $\text{cm}^{-1}$ ;  $^1\text{H}$  NMR (600 MHz,  $\text{DMSO-}d_6$ ):  $\delta$  = 12.58 (br, 1H, NH), 7.40–7.38 (m, 2H, PhH), 7.22–7.19 (m, 2H, PhH), 3.85–3.58 (m, 2H,  $\text{NCH}_2$ ), 3.45–3.36 (m, 2H,  $\text{NCH}_2$ ), 2.49–3.46 (m, H, CH), 2.42–2.27 (m, 2H,  $\text{CH}_2$ ), 1.96–1.89

(m, 2H, CH<sub>2</sub>), 1.04 (m, 3H, CH<sub>3</sub>); <sup>13</sup>C NMR (150 MHz, DMSO-*d*<sub>6</sub>): δ = 185.9, 173.2, 162.4 (d, *J* = 244.5 Hz), 156.7, 139.2, 129.5, 115.2 (d, *J* = 21.0 Hz), 86.6, 39.6, 38.4, 36.3, 29.9, 20.6, 15.6; HRMS (ESI) *m/z* calcd for C<sub>16</sub>H<sub>18</sub>FN<sub>2</sub>O<sub>2</sub> [M+H]<sup>+</sup>, 289.1347; found, 289.1349.

**7-Methyl-9-nitro-1,2,3,4,7,8-hexahydro-6*H*-pyrido[1,2-*a*]pyrimidin-6-one (4e).**

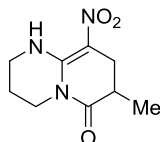

yellow solid: mp 228–232 °C; IR (KBr): 3395, 2976, 1705, 1623, 1500, 1394, 1243, 1140, 994, 811 cm<sup>-1</sup>; <sup>1</sup>H NMR (600 MHz, CDCl<sub>3</sub>): δ = 11.75 (br, 1H, NH), 3.92–3.68 (m, 2H, NCH<sub>2</sub>), 3.54–3.47 (m, 2H, NCH<sub>2</sub>), 2.30–2.26 (m, H, CH), 2.64–2.47 (m, 2H, CH<sub>2</sub>), 2.04–1.99 (m, 2H, CH<sub>2</sub>), 1.24 (m, 3H, CH<sub>3</sub>); <sup>13</sup>C NMR (150 MHz, CDCl<sub>3</sub>): δ = 172.3, 152.5, 106.3b 39.7, 39.1, 35.2b 27.9, 20.0, 15.5; HRMS (ESI) *m/z* calcd for C<sub>9</sub>H<sub>14</sub>N<sub>3</sub>O<sub>3</sub> [M+H]<sup>+</sup>, 212.1030; found, 212.1030.

**10-(4-Methoxybenzoyl)-8-methyl-2,3,4,5,8,9-hexahydropyrido[1,2-*a*][1,3]diazepin-7(1*H*)-one (4f).**

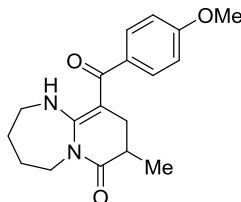

White solid: mp 126–127.5 °C; IR (KBr): 3416, 2937, 1694, 1601, 1434, 1258, 1149, 999, 900, 642 cm<sup>-1</sup>; <sup>1</sup>H NMR (500 MHz, CDCl<sub>3</sub>): δ = 11.63 (br, 1H, NH), 7.41 (d, *J* = 8.6 Hz, 2H, PhH), 6.92 (d, *J* = 8.3 Hz, 2H, PhH), 4.44–3.51 (m, 2H, NCH<sub>2</sub>), 3.85 (s, 3H, OCH<sub>3</sub>), 3.47–3.31 (m, 2H, NCH<sub>2</sub>), 2.63–2.31 (m, 2H, CH<sub>2</sub>), 2.50–2.42 (m, H, CH), 2.03–1.79 (m, 4H, CH<sub>2</sub>CH<sub>2</sub>), 1.18–1.16 (m, 3H, CH<sub>3</sub>); <sup>13</sup>C NMR (125 MHz, CDCl<sub>3</sub>): δ = 190.6, 174.5, 161.9, 160.3, 134.4, 128.7, 113.2, 92.5, 55.2, 45.1, 44.9, 37.8, 30.6, 26.5, 26.2, 14.6; HRMS (ESI) *m/z* calcd for C<sub>18</sub>H<sub>23</sub>N<sub>2</sub>O<sub>3</sub> [M+H]<sup>+</sup>, 315.1703; found, 315.1707.

**10-Benzoyl-8-methyl-2,3,4,5,8,9-hexahydropyrido[1,2-*a*][1,3]diazepin-7(1*H*)-one (4g).**

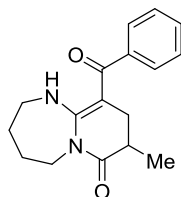

White solid: mp 131–132 °C; IR (KBr): 3438, 2937, 1697, 1602, 1473, 1432, 1242, 1150, 997, 708  $\text{cm}^{-1}$ ;  $^1\text{H}$  NMR (600 MHz,  $\text{CDCl}_3$ ):  $\delta$  = 11.66 (br, 1H, NH), 7.31 (m, 5H, PhH), 4.33–3.45 (m, 2H,  $\text{NCH}_2$ ), 3.41–3.25 (m, 2H,  $\text{NCH}_2$ ), 2.47–2.35 (m, 2H,  $\text{CH}_2$ ), 2.23–2.18 (m, H, CH), 1.81–1.71 (m, 4H,  $\text{CH}_2\text{CH}_2$ ), 1.08–1.06 (d,  $J$  = 6.7 Hz, 3H,  $\text{CH}_3$ );  $^{13}\text{C}$  NMR (150 MHz,  $\text{CDCl}_3$ ):  $\delta$  = 191.0, 174.6, 162.1, 142.1, 129.1, 128.1, 126.8, 92.4, 45.2, 44.9, 37.8, 30.3, 26.5, 26.1, 14.7; HRMS (ESI)  $m/z$  calcd for  $\text{C}_{17}\text{H}_{21}\text{N}_2\text{O}_2$   $[\text{M}+\text{H}]^+$ , 285.1598; found, 285.1598.

**6-Methyl-8-(4-methylbenzoyl)-2,3,6,7-tetrahydroimidazo[1,2-*a*]pyridin-5(1*H*)-one (4h).**

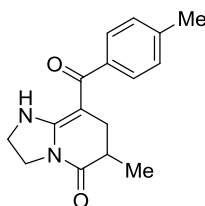

White solid: mp 162.5–164 °C; IR (KBr): 3291, 2962, 2817, 1686, 1634, 1525, 1439, 1286, 1033, 750  $\text{cm}^{-1}$ ;  $^1\text{H}$  NMR (600 MHz,  $\text{DMSO-}d_6$ ):  $\delta$  = 9.34 (br, 1H, NH), 7.30 (d,  $J$  = 8.0 Hz, 2H, PhH), 7.20 (d,  $J$  = 7.9 Hz, 2H, PhH), 3.88–3.67 (m, 4H,  $\text{NCH}_2\text{CH}_2$ ), 3.34 (s, 3H,  $\text{CH}_3$ ), 2.59–2.56 (m, H, CH), 2.51–2.40 (m, 2H,  $\text{CH}_2$ ), 1.07–1.06 (m, 3H,  $\text{CH}_3$ );  $^{13}\text{C}$  NMR (150 MHz,  $\text{DMSO-}d_6$ ):  $\delta$  = 189.1, 172.0, 156.5, 139.5, 139.0, 128.9, 127.4, 84.4, 43.3, 42.2, 36.8, 30.9, 21.4, 15.6; HRMS (ESI)  $m/z$  calcd for  $\text{C}_{16}\text{H}_{19}\text{N}_2\text{O}_2$   $[\text{M}+\text{H}]^+$ , 271.1441; found, 271.1444.

**8-Benzoyl-6-methyl-2,3,6,7-tetrahydroimidazo[1,2-*a*]pyridin-5(1*H*)-one (4i).**

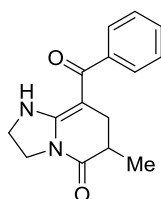

White solid: mp 144.5–145.5 °C; IR (KBr): 3320, 2970, 1689, 1632, 1526, 1382, 1285, 1211, 1035, 736  $\text{cm}^{-1}$ ;  $^1\text{H}$  NMR (600 MHz,  $\text{DMSO-}d_6$ ):  $\delta$  = 9.38 (br, 1H, NH), 7.42–7.38 (m, 5H, PhH), 3.89–3.68 (m, 4H,  $\text{NCH}_2\text{CH}_2$ ), 2.58–2.55 (m, H, CH), 2.54–2.40 (m, 2H,  $\text{CH}_2$ ), 1.08–1.07 (m, 3H,  $\text{CH}_3$ );  $^{13}\text{C}$  NMR (150 MHz,  $\text{DMSO-}d_6$ ):  $\delta$  = 189.1, 172.0, 156.6, 142.3, 129.4, 128.4, 127.2, 84.3, 43.3, 42.2, 36.8, 30.8, 15.6; HRMS (ESI)  $m/z$  calcd for  $\text{C}_{15}\text{H}_{17}\text{N}_2\text{O}_2$   $[\text{M}+\text{H}]^+$ , 257.1285; found, 257.1284.

**8-(4-Methoxybenzoyl)-6-methyl-2,3,6,7-tetrahydroimidazo[1,2-*a*]pyridin-5(1*H*)-one (4j).**

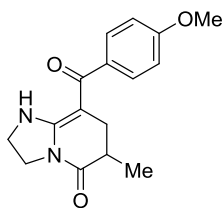

White solid: mp 164–165 °C; IR (KBr): 3416, 3285, 2971, 1683, 1633, 1577, 1496, 1289, 1167, 1022, 841  $\text{cm}^{-1}$ ;  $^1\text{H}$  NMR (600 MHz,  $\text{DMSO-}d_6$ ):  $\delta$  = 9.33 (br, 1H, NH), 7.40 (d,  $J$  = 8.7 Hz, 2H, PhH), 6.95 (d,  $J$  = 8.7 Hz, 2H, PhH), 3.89–3.67 (m, 4H,  $\text{NCH}_2\text{CH}_2$ ), 3.79 (s, 3H,  $\text{OCH}_3$ ), 2.64–2.62 (m, H, CH), 2.52–2.45 (m, 2H,  $\text{CH}_2$ ), 1.09–1.08 (m, 3H,  $\text{CH}_3$ );  $^{13}\text{C}$  NMR (150 MHz,  $\text{DMSO-}d_6$ ):  $\delta$  = 188.5, 172.0, 160.4, 156.4, 134.6, 129.2, 113.6, 84.4, 55.6, 43.3, 42.2, 36.8, 31.1, 15.6; HRMS (ESI)  $m/z$  calcd for  $\text{C}_{16}\text{H}_{19}\text{N}_2\text{O}_3$   $[\text{M}+\text{H}]^+$ , 287.1390; found, 287.1392.

**8-(4-Chlorobenzoyl)-6-methyl-2,3,6,7-tetrahydroimidazo[1,2-*a*]pyridin-5(1H)-one (4k).**

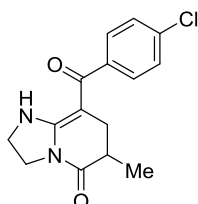

White solid: mp 191.5–192.5 °C; IR (KBr): 3424, 2975, 1683, 1635, 1504, 1439, 1292, 1024, 758  $\text{cm}^{-1}$ ;  $^1\text{H}$  NMR (500 MHz,  $\text{CDCl}_3$ ):  $\delta$  = 9.44 (br, 1H, NH), 7.42–7.37 (m, 4H, PhH), 4.07–3.83 (m, 4H,  $\text{NCH}_2\text{CH}_2$ ), 2.73–2.69 (m, H, CH), 2.57–2.45 (m, 2H,  $\text{CH}_2$ ), 1.24–1.22 (s, 3H,  $\text{CH}_3$ );  $^{13}\text{C}$  NMR (125 MHz,  $\text{CDCl}_3$ ):  $\delta$  = 189.9, 172.6, 157.6, 140.0, 135.7, 128.8, 128.6, 85.4, 43.3, 42.5, 37.5, 31.1, 15.7; HRMS (ESI)  $m/z$  calcd for  $\text{C}_{15}\text{H}_{16}\text{ClN}_2\text{O}_2$   $[\text{M}+\text{H}]^+$ , 291.0895; found, 291.0894.

**8-(2-Chlorobenzoyl)-6-methyl-2,3,6,7-tetrahydroimidazo[1,2-*a*]pyridin-5(1H)-one (4l).**

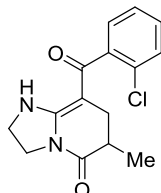

White solid: mp 171–173 °C; IR (KBr): 3415, 3306, 2966, 1691, 1634, 1513, 1283, 1036, 752  $\text{cm}^{-1}$ ;  $^1\text{H}$  NMR (600 MHz,  $\text{CDCl}_3$ ):  $\delta$  = 9.23 (br, 1H, NH), 7.32–7.31 (m, H, PhH), 7.23–7.20 (m, 2H, PhH), 7.16–7.14 (m, H, PhH), 3.98–3.77 (m, 4H,  $\text{NCH}_2\text{CH}_2$ ), 2.51–2.48 (m, H, CH), 2.32–2.16 (m, 2H,  $\text{CH}_2$ ), 1.13–1.12 (s, 3H,  $\text{CH}_3$ );  $^{13}\text{C}$  NMR (150 MHz,  $\text{CDCl}_3$ ):  $\delta$  = 189.9, 172.3, 156.7, 140.7, 130.1, 129.6, 129.5, 127.7, 126.9,

85.5, 42.9, 42.1, 37.0, 29.1, 15.4; HRMS (ESI)  $m/z$  calcd for  $C_{15}H_{16}ClN_2O_2$   $[M+H]^+$ , 291.0895; found, 291.0897.

**8-(4-Fluorobenzoyl)-6-methyl-2,3,6,7-tetrahydroimidazo[1,2-*a*]pyridin-5(1*H*)-one (4m).**

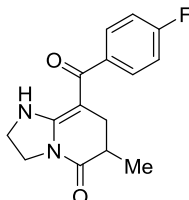

yellow solid: mp 154–155 °C; IR (KBr): 3415, 3311, 2979, 1683, 1637, 1600, 1441, 1286, 1155, 1034, 840  $cm^{-1}$ ;  $^1H$  NMR (500 MHz,  $CDCl_3$ ):  $\delta$  = 9.41 (br, 1H, NH), 7.49–7.46 (m, 2H, PhH), 7.11–7.08 (m, 2H, PhH), 4.08–3.84 (m, 4H,  $NCH_2CH_2$ ), 2.75–2.72 (m, H, CH), 2.58–2.48 (m, 2H,  $CH_2$ ), 1.25–1.24 (s, 3H,  $CH_3$ );  $^{13}C$  NMR (125 MHz,  $CDCl_3$ ):  $\delta$  = 190.1, 172.6, 163.7 (d,  $J$  = 248.0 Hz), 157.6, 137.7, 129.6, 115.4 (d,  $J$  = 21.0 Hz), 85.4, 43.3, 42.5, 37.6, 31.1, 15.7; HRMS (ESI)  $m/z$  calcd for  $C_{15}H_{16}FN_2O_2$   $[M+H]^+$ , 275.1190; found, 275.1191.

**6-Methyl-8-nitro-2,3,6,7-tetrahydroimidazo[1,2-*a*]pyridin-5(1*H*)-one (4n).**

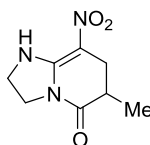

yellow solid: mp 240–250 °C; IR (KBr): 3415, 3238, 2989, 1700, 1625, 1491, 1376, 1289, 1184, 685  $cm^{-1}$ ;  $^1H$  NMR (600 MHz,  $DMSO-d_6$ ):  $\delta$  = 9.53 (br, 1H, NH), 3.92–3.70 (m, 4H,  $NCH_2CH_2$ ), 3.11–3.07 (m, H, CH), 2.74–2.43 (m, 2H,  $CH_2$ ), 1.17–1.16 (m, 3H,  $CH_3$ );  $^{13}C$  NMR (150 MHz,  $DMSO-d_6$ ):  $\delta$  = 171.4, 153.0, 103.3, 43.8, 43.2, 35.6, 28.9, 15.8; HRMS (ESI)  $m/z$  calcd for  $C_8H_{12}N_3O_3$   $[M+H]^+$ , 198.0873; found, 198.0875.

**9-(4-Methoxybenzoyl)-8-methyl-1,2,3,4,7,8-hexahydro-6*H*-pyrido[1,2-*a*]pyrimidin-6-one (5a).**

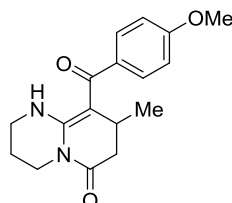

White solid: mp 154–156.5 °C; IR (KBr): 3415, 2967, 1693, 1654, 1446, 1316, 1169, 1032, 837  $cm^{-1}$ ;  $^1H$  NMR (500 MHz,  $DMSO-d_6$ ):  $\delta$  = 12.69 (br, 1H, NH), 7.25 (d,  $J$  =



8.5 Hz, 2H, PhH), 6.93 (d,  $J = 8.5$  Hz, 2H, PhH), 3.93–3.52 (m, 2H, NCH<sub>2</sub>), 3.78 (s, 3H, OCH<sub>3</sub>), 3.57–3.34 (m, 2H, NCH<sub>2</sub>), 2.81–2.77 (m, 2H, CH<sub>2</sub>), 2.32–2.28 (m, H, CH), 1.94–1.93 (m, 2H, CH<sub>2</sub>), 0.82–0.81 (m, 3H, CH<sub>3</sub>); <sup>13</sup>C NMR (150 MHz, DMSO-*d*<sub>6</sub>):  $\delta = 187.7, 169.6, 159.4, 155.7, 135.5, 128.1, 113.6, 92.4, 55.5, 39.9, 38.8, 38.4, 26.2, 21.3, 20.5$ ; HRMS (ESI)  $m/z$  calcd for C<sub>17</sub>H<sub>21</sub>N<sub>2</sub>O<sub>3</sub> [M+H]<sup>+</sup>, 301.1547; found, 301.1549.

**9-Benzoyl-8-methyl-1,2,3,4,7,8-hexahydro-6H-pyrido[1,2-*a*]pyrimidin-6-one (5b).**

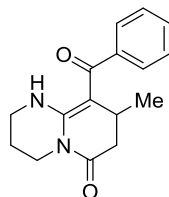

White solid: mp 125–127.5°C; IR (KBr): 3416, 2957, 1698, 1611, 1536, 1449, 1277, 1159, 713, 696 cm<sup>-1</sup>; <sup>1</sup>H NMR (500 MHz, DMSO-*d*<sub>6</sub>):  $\delta = 12.58$  (br, 1H, NH), 7.41–7.34 (m, 3H, PhH), 7.29–7.27 (m, 2H, PhH), 3.93–3.53 (m, 2H, NCH<sub>2</sub>), 3.47–3.35 (m, 2H, NCH<sub>2</sub>), 2.80–2.67 (m, 2H, CH<sub>2</sub>), 2.31–2.27 (m, H, CH), 1.94–1.93 (m, 2H, CH<sub>2</sub>), 0.81–0.80 (m, 3H, CH<sub>3</sub>); <sup>13</sup>C NMR (150 MHz, DMSO-*d*<sub>6</sub>):  $\delta = 188.0, 169.6, 155.8, 143.0, 128.3, 126.3, 92.3, 39.4, 38.8, 38.4, 26.1, 21.3, 20.4$ ; HRMS (ESI)  $m/z$  calcd for C<sub>16</sub>H<sub>19</sub>N<sub>2</sub>O<sub>2</sub> [M+H]<sup>+</sup>, 271.1441; found, 271.1442.

**9-(4-Chlorobenzoyl)-8-methyl-1,2,3,4,7,8-hexahydro-6H-pyrido[1,2-*a*]pyrimidin-6-one (5c).**

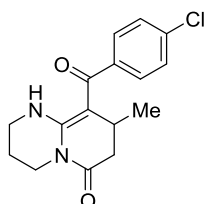

White solid: mp 135.5–136.5 °C; IR (KBr): 3438, 2959, 1696, 1618, 1541, 1384, 1275, 1155, 837, 674 cm<sup>-1</sup>; <sup>1</sup>H NMR (600 MHz, CDCl<sub>3</sub>):  $\delta = 12.66$  (br, 1H, NH), 7.28 (d,  $J = 8.0$  Hz, 2H, PhH), 7.21 (d,  $J = 7.9$  Hz, 2H, PhH), 4.03–3.55 (m, 2H, NCH<sub>2</sub>), 3.45–3.35 (m, 2H, NCH<sub>2</sub>), 2.73–2.61 (m, 2H, CH<sub>2</sub>), 2.36–2.35 (m, H, CH), 1.99–1.95 (m, 2H, CH<sub>2</sub>), 0.85 (m, 3H, CH<sub>3</sub>); <sup>13</sup>C NMR (150 MHz, CDCl<sub>3</sub>):  $\delta = 188.0, 169.8, 156.0, 140.7, 134.1, 128.4, 127.7, 93.0, 39.6, 38.8, 38.6, 26.2, 21.1, 20.6$ ; HRMS (ESI)  $m/z$  calcd for C<sub>16</sub>H<sub>18</sub>ClN<sub>2</sub>O<sub>2</sub> [M+H]<sup>+</sup>, 305.1051; found, 305.1049.

**9-(4-Fluorobenzoyl)-8-methyl-1,2,3,4,7,8-hexahydro-6H-pyrido[1,2-*a*]pyrimidin-6-one (5d).**

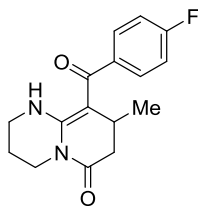

yellow solid: mp 130–132 °C; IR (KBr): 3437, 2958, 1697, 1599, 1529, 1383, 1153, 836  $\text{cm}^{-1}$ ;  $^1\text{H}$  NMR (600 MHz,  $\text{CDCl}_3$ ):  $\delta$  = 12.68 (br, 1H, NH), 7.26–7.24 (m, 2H, PhH), 7.00–6.97 (m, 2H, PhH), 4.03–3.54 (m, 2H,  $\text{NCH}_2$ ), 3.45–3.35 (m, 2H,  $\text{NCH}_2$ ), 2.75–2.72 (m, H, CH), 2.66–2.38 (m, 2H,  $\text{CH}_2$ ), 1.99–1.95 (m, 2H,  $\text{CH}_2$ ), 0.85–0.84 (m, 3H,  $\text{CH}_3$ );  $^{13}\text{C}$  NMR (150 MHz,  $\text{CDCl}_3$ ):  $\delta$  = 188.3, 169.8, 162.6 (d,  $J$  = 246.0 Hz), 156.0, 138.5, 128.1, 115.1 (d,  $J$  = 21.0 Hz), 93.0, 39.6, 38.8, 38.6, 26.2, 21.0, 20.7; HRMS (ESI)  $m/z$  calcd for  $\text{C}_{16}\text{H}_{18}\text{FN}_2\text{O}_2$  [ $\text{M}+\text{H}$ ] $^+$ , 289.1347; found, 289.1346.

**8-Methyl-9-nitro-1,2,3,4,7,8-hexahydro-6H-pyrido[1,2-a] pyrimidin-6-one (5e).**

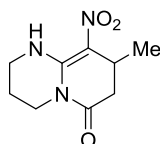

yellow solid: mp 212–214.5 °C; IR (KBr): 3408, 3073, 2960, 1713, 1617, 1511, 1391, 1161, 1051, 955, 784  $\text{cm}^{-1}$ ;  $^1\text{H}$  NMR (600 MHz,  $\text{CDCl}_3$ ):  $\delta$  = 4.03–3.63 (m, 2H,  $\text{NCH}_2$ ), 3.62–3.53 (m, 2H,  $\text{NCH}_2$ ), 3.52–2.46 (m, H, CH), 2.74–2.51 (m, 2H,  $\text{CH}_2$ ), 2.04–1.99 (m, 2H,  $\text{CH}_2$ ), 1.73 (br, 1H, NH), 1.06 (d,  $J$  = 6.9 Hz, 3H,  $\text{CH}_3$ );  $^{13}\text{C}$  NMR (150 MHz,  $\text{CDCl}_3$ ):  $\delta$  = 168.9, 151.8, 111.4, 39.3, 39.1, 38.0, 26.3, 19.9, 17.4; HRMS (ESI)  $m/z$  calcd for  $\text{C}_9\text{H}_{14}\text{N}_3\text{O}_3$  [ $\text{M}+\text{H}$ ] $^+$ , 212.1030; found, 212.1030.

**10-(4-Methoxybenzoyl)-9-methyl-2,3,4,5,8,9-hexahydropyrido[1,2-a][1,3] diazepin-7(1H)-one (5f).**

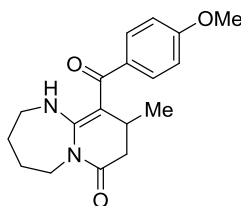

Light yellow solid: mp 162.5–163.5 °C; IR (KBr): 3449, 2953, 1695, 1697, 1474, 1432, 1266, 1149, 1000, 849  $\text{cm}^{-1}$ ;  $^1\text{H}$  NMR (600 MHz,  $\text{CDCl}_3$ ):  $\delta$  = 11.40 (br, 1H, NH), 7.27 (d,  $J$  = 8.6 Hz, 2H, PhH), 6.83 (d,  $J$  = 8.6 Hz, 2H, PhH), 4.61–3.46 (m, 2H,  $\text{NCH}_2$ ), 3.76 (s, 3H,  $\text{OCH}_3$ ), 3.12–3.08 (m, 2H,  $\text{NCH}_2$ ), 2.86–2.62 (m, 2H,  $\text{CH}_2$ ), 2.35–2.32 (m, H, CH), 1.85–1.65 (m, 4H,  $\text{CH}_2\text{CH}_2$ ), 0.85 (d,  $J$  = 7.0 Hz, 3H,  $\text{CH}_3$ );  $^{13}\text{C}$  NMR (150 MHz,  $\text{CDCl}_3$ ):  $\delta$  = 191.6, 171.3, 161.4, 160.2, 134.9, 128.1, 113.4,

98.8, 55.3, 45.4, 44.8, 40.8, 26.9, 26.8, 26.6, 19.5; HRMS (ESI)  $m/z$  calcd for  $C_{18}H_{23}N_2O_3$   $[M+H]^+$ , 315.1703; found, 315.1705.

**10-Benzoyl-9-methyl-2,3,4,5,8,9-hexahydropyrido[1,2-*a*][1,3] diazepin-7(1*H*)-one (5g).**

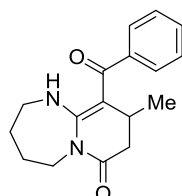

White solid: mp 157–159.5 °C; IR (KBr): 3290, 3066, 2951, 1696, 1596, 1471, 1310, 1147, 1004, 799, 710  $cm^{-1}$ ;  $^1H$  NMR (600 MHz,  $CDCl_3$ +  $DMSO-d_6$ ):  $\delta$  = 7.05–6.97 (m, 5H, PhH), 4.32–3.24 (m, 2H,  $NCH_2$ ), 2.94–2.69 (m, 2H,  $NCH_2$ ), 2.46–2.42 (m, H, CH), 2.38–2.00 (m, 2H,  $CH_2$ ), 1.59–1.39 (m, 4H,  $CH_2CH_2$ ), 1.44 (br, 1H, NH), 0.56 (d,  $J$  = 6.9 Hz, 3H,  $CH_3$ );  $^{13}C$  NMR (150 MHz,  $CDCl_3$ +  $DMSO-d_6$ ):  $\delta$  = 190.6, 170.1, 160.7, 141.5, 127.7, 127.3, 125.1, 97.3, 44.4, 43.8, 39.8, 38.0, 25.7, 25.6, 18.7; HRMS (ESI)  $m/z$  calcd for  $C_{17}H_{21}N_2O_2$   $[M+H]^+$ , 285.1598; found, 285.1596.

**7-Methyl-8-(4-methylbenzoyl)-2,3,6,7-tetrahydroimidazo[1,2-*a*]pyridin-5(1*H*)-one (5h).**

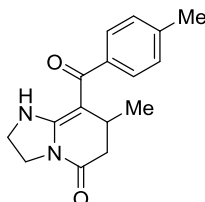

White solid: mp 173–176 °C; IR (KBr): 3449, 3299, 2957, 1694, 1625, 1528, 1371, 1320, 1201, 1025, 769  $cm^{-1}$ ;  $^1H$  NMR (500 MHz,  $CDCl_3$ ):  $\delta$  = 9.50 (br, 1H, NH), 7.32 (d,  $J$  = 7.8 Hz, 2H, PhH), 7.21 (d,  $J$  = 7.7 Hz, 2H, PhH), 4.12–3.77 (m, 4H,  $NCH_2CH_2$ ), 3.09–3.07 (m, H, CH), 2.76–2.43 (m, 2H,  $CH_2$ ), 2.39 (s, 3H,  $CH_3$ ), 0.97–0.96 (m, 3H,  $CH_3$ );  $^{13}C$  NMR (125 MHz,  $CDCl_3$ ):  $\delta$  = 191.9, 168.8, 156.0, 138.9, 128.9, 126.4, 91.5, 42.5, 41.7, 39.7, 27.4, 22.0, 21.3; HRMS (ESI)  $m/z$  calcd for  $C_{16}H_{19}N_2O_2$   $[M+H]^+$ , 271.1441; found, 271.1440.

**8-Benzoyl-7-methyl-2,3,6,7-tetrahydroimidazo[1,2-*a*]pyridin-5(1*H*)-one (5i).**

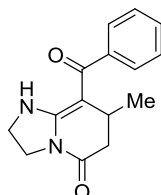

White solid: mp 138–139 °C; IR (KBr): 3289, 2958, 1695, 1625, 1524, 1439, 1328, 1207, 0127, 700  $\text{cm}^{-1}$ ;  $^1\text{H}$  NMR (600 MHz,  $\text{CDCl}_3$ ):  $\delta$  = 9.43 (br, 1H, NH), 7.31 (m, 5H, PhH), 4.04–3.71 (m, 4H,  $\text{NCH}_2\text{CH}_2$ ), 2.96–2.93 (m, H, CH), 2.67–2.33 (m, 2H,  $\text{CH}_2$ ), 0.88–0.87 (m, 3H,  $\text{CH}_3$ );  $^{13}\text{C}$  NMR (150 MHz,  $\text{CDCl}_3$ ):  $\delta$  = 192.0, 168.9, 156.2, 141.7, 129.0, 128.2, 126.4, 91.5, 42.6, 41.8, 39.8, 27.5, 19.6; HRMS (ESI)  $m/z$  calcd for  $\text{C}_{15}\text{H}_{17}\text{N}_2\text{O}_2$   $[\text{M}+\text{H}]^+$ , 257.1285; found, 257.1286.

**8-(4-Chlorobenzoyl)-7-methyl-2,3,6,7-tetrahydroimidazo[1,2-*a*]pyridin-5(1*H*)-one (5j).**

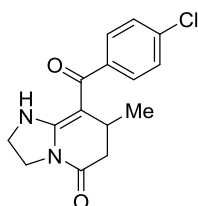

White solid: mp 144–145.5 °C; IR (KBr): 3415, 3316, 2945, 1691, 1625, 1520, 1445, 1329, 1025, 671  $\text{cm}^{-1}$ ;  $^1\text{H}$  NMR (500 MHz,  $\text{CDCl}_3$ ):  $\delta$  = 9.53 (br, 1H, NH), 7.39–7.35 (m, 4H, PhH), 4.13–3.80 (m, 4H,  $\text{NCH}_2\text{CH}_2$ ), 3.01–2.99 (m, H, CH), 2.76–2.43 (m, 2H,  $\text{CH}_2$ ), 0.97–0.96 (m, 3H,  $\text{CH}_3$ );  $^{13}\text{C}$  NMR (125 MHz,  $\text{CDCl}_3$ ):  $\delta$  = 190.8, 169.1, 156.9, 140.4, 135.3, 128.8, 128.3, 91.8, 43.0, 42.3, 40.1, 27.9, 22.5; HRMS (ESI)  $m/z$  calcd for  $\text{C}_{15}\text{H}_{16}\text{ClN}_2\text{O}_2$   $[\text{M}+\text{H}]^+$ , 291.0895; found, 291.0898.

**8-(2-Chlorobenzoyl)-7-methyl-2,3,6,7-tetrahydroimidazo[1,2-*a*]pyridin-5(1*H*)-one (5k).**

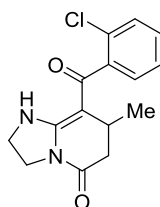

White solid: mp 228–229 °C; IR (KBr): 3415, 3319, 2959, 1697, 1630, 1529, 1375, 1208, 1027, 755  $\text{cm}^{-1}$ ;  $^1\text{H}$  NMR (600 MHz,  $\text{CDCl}_3$ ):  $\delta$  = 9.30 (br, 1H, NH), 7.31–7.18 (m, 4H, PhH), 4.05–3.75 (m, 4H,  $\text{NCH}_2\text{CH}_2$ ), 2.68–2.58 (m, 2H,  $\text{CH}_2$ ), 2.35–2.32 (m, H, CH), 0.84–0.83 (m, 3H,  $\text{CH}_3$ );  $^{13}\text{C}$  NMR (150 MHz,  $\text{CDCl}_3$ ):  $\delta$  = 189.0, 168.9, 156.1, 140.5, 130.2, 129.5, 127.8, 126.8, 91.8, 42.7, 41.8, 39.8, 27.4, 21.8; HRMS (ESI)  $m/z$  calcd for  $\text{C}_{15}\text{H}_{16}\text{ClN}_2\text{O}_2$   $[\text{M}+\text{H}]^+$ , 291.0895; found, 291.0896.

**8-(4-Fluorobenzoyl)-7-methyl-2,3,6,7-tetrahydroimidazo[1,2-*a*]pyridin-5(1*H*)-one (5l).**

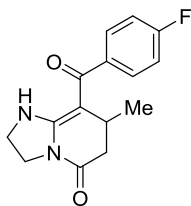

yellow solid: mp 143–144.5 °C; IR (KBr): 3290, 2961, 1703, 1622, 1527, 1371, 1226, 1026, 851, 772  $\text{cm}^{-1}$ ;  $^1\text{H}$  NMR (500 MHz,  $\text{DMSO-}d_6$ ):  $\delta$  = 9.39 (br, 1H, NH), 7.44–7.41 (m, 2H, PhH), 7.24–7.21 (m, 2H, PhH), 3.93–3.63 (m, 4H,  $\text{NCH}_2\text{CH}_2$ ), 2.88–2.75 (m, 2H,  $\text{CH}_2$ ), 2.27–2.24 (m, H, CH), 0.95–0.83 (s, 3H,  $\text{CH}_3$ );  $^{13}\text{C}$  NMR (125 MHz,  $\text{DMSO-}d_6$ ):  $\delta$  = 188.6, 168.5, 162.4 (d,  $J$  = 243.0 Hz), 155.8, 139.1, 129.0, 115.2 (d,  $J$  = 21.0 Hz), 90.5, 42.9, 41.8, 39.4, 27.6, 22.2; HRMS (ESI)  $m/z$  calcd for  $\text{C}_{15}\text{H}_{16}\text{FN}_2\text{O}_2$   $[\text{M}+\text{H}]^+$ , 275.1190; found, 275.1191.

### General procedure for the synthesis of compounds 6

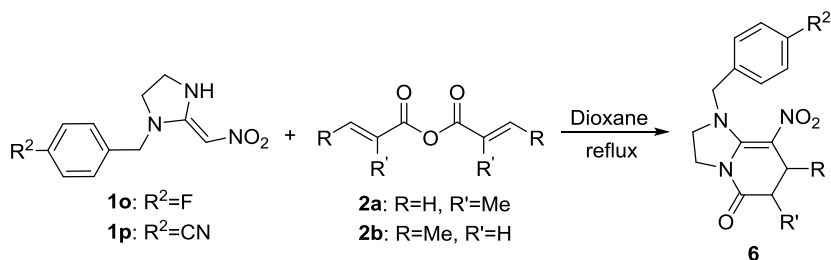

HKA derivatives **1** (1.0 mmol), methacrylic anhydride **2a** or crotonic anhydride **2b** (1.2 mmol) and dry dioxane (10.0 mL) were placed in a 25 mL round-bottom flask and the mixture was stirred at reflux for 3-8 h. Upon completion, as monitored by TLC. Then the reaction mixture was cooled to room temperature and filtered to give the pure crude product, which was further washed with petroleum ether-EtOAc(1:1) to give pure product **6** with a yield of 87-93%.

### Spectroscopic data of bicyclic pyridones derivatives 6

**1-(4-Fluorobenzyl)-6-methyl-8-nitro-2,3,6,7-tetrahydroimidazo[1,2-*a*]pyridin-5(1H)-one (6a).**

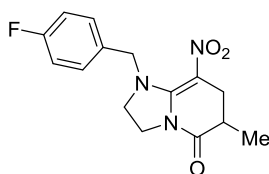

yellow solid: mp 188–189 °C; IR (KBr): 3415, 3063, 2974, 1711, 1609, 1436, 1380, 1221, 1156, 832  $\text{cm}^{-1}$ ;  $^1\text{H}$  NMR (600 MHz,  $\text{CDCl}_3$ ):  $\delta$  = 7.23–7.21 (m, 2H, PhH), 7.00–6.97 (m, 2H, PhH), 4.79 (d,  $J$  = 15 Hz, H, NCH), 4.73 (d,  $J$  = 15 Hz, H, NCH), 3.92–3.57 (m, 4H,  $\text{NCH}_2\text{CH}_2$ ), 3.33–2.28 (m, H, CH), 2.63–2.59 (m, 2H,  $\text{CH}_2$ ), 1.22–1.21 (m, 3H,  $\text{CH}_3$ );  $^{13}\text{C}$  NMR (150 MHz,  $\text{CDCl}_3$ ):  $\delta$  = 171.7, 162.7 (d,  $J$  = 246.0 Hz), 151.8, 130.5, 130.1, 116.0 (d,  $J$  = 21.0 Hz), 105.2, 54.3, 49.3, 41.3, 36.4, 30.8, 15.2; HRMS (ESI)  $m/z$  calcd for  $\text{C}_{15}\text{H}_{17}\text{FN}_3\text{O}_3$   $[\text{M}+\text{H}]^+$ , 306.1248; found, 306.1249.

**4-((6-Methyl-8-nitro-5-oxo-2,3,6,7-tetrahydroimidazo[1,2-a]pyridin-1(5H)-yl)methyl)benzonitrile (6b)**

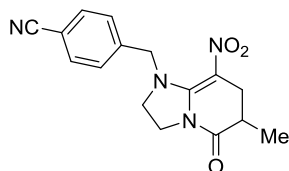

yellow solid: mp 166.5–167.5 °C; IR (KBr): 3432, 2978, 2230, 1694, 1606, 1255, 1189, 927, 823, 550  $\text{cm}^{-1}$ ;  $^1\text{H}$  NMR (600 MHz,  $\text{CDCl}_3$ ):  $\delta$  = 7.60 (d,  $J$  = 8.2 Hz, 2H, PhH), 7.40 (d,  $J$  = 8.1 Hz, 2H, PhH), 4.90 (d,  $J$  = 15.8 Hz, H, NCH), 4.79 (d,  $J$  = 15.7 Hz, H, NCH), 3.99–3.58 (m, 4H,  $\text{NCH}_2\text{CH}_2$ ), 3.30–2.28 (m, H, CH), 2.64–2.60 (m, 2H,  $\text{CH}_2$ ), 1.23–1.19 (m, 3H,  $\text{CH}_3$ );  $^{13}\text{C}$  NMR (150 MHz,  $\text{CDCl}_3$ ):  $\delta$  = 171.6, 151.9, 140.4, 132.7, 128.5, 118.3, 112.2, 105.6, 55.0, 50.1, 41.4, 36.3, 30.7, 15.1; HRMS (ESI)  $m/z$  calcd for  $\text{C}_{16}\text{H}_{17}\text{N}_4\text{O}_3$   $[\text{M}+\text{H}]^+$ , 313.1295; found, 313.1296.

**1-(4-Fluorobenzyl)-7-methyl-8-nitro-2,3,6,7-tetrahydroimidazo[1,2-a]pyridin-5(1H)-one (6c)**

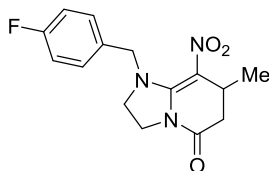

yellow solid: mp 150–152 °C; IR (KBr): 3394, 2953, 1710, 1590, 1437, 1145, 758, 597  $\text{cm}^{-1}$ ;  $^1\text{H}$  NMR (500 MHz,  $\text{CDCl}_3$ ):  $\delta$  = 7.17–7.16 (m, 2H, PhH), 6.99–6.96 (m, 2H, PhH), 4.82–4.65 (m, 2H, NCH), 3.99–3.60 (m, 4H,  $\text{NCH}_2\text{CH}_2$ ), 3.58–3.56 (m, H, CH), 2.74–2.41 (m, 2H,  $\text{CH}_2$ ), 1.00–0.99 (m, 3H,  $\text{CH}_3$ );  $^{13}\text{C}$  NMR (150 MHz,  $\text{CDCl}_3 + \text{DMSO}-d_6$ ):  $\delta$  = 172.4, 167.1 (d,  $J$  = 244.5 Hz), 155.5, 135.8, 134.7, 120.4 (d,  $J$  = 21.0 Hz), 115.7, 58.6, 54.9, 45.9, 43.3, 34.1, 23.8; HRMS (ESI)  $m/z$  calcd for  $\text{C}_{15}\text{H}_{17}\text{FN}_3\text{O}_3$   $[\text{M}+\text{H}]^+$ , 306.1248; found, 306.1244.

**4-((7-Methyl-8-nitro-5-oxo-2,3,6,7-tetrahydroimidazo[1,2-a]pyridin-1(5H)-yl)methyl)benzonitrile (6d)**

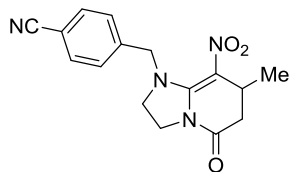

yellow solid: mp 163.5–164.5 °C; IR (KBr): 3438, 2966, 2230, 1705, 1598, 1309, 1138, 757, 564  $\text{cm}^{-1}$ ;  $^1\text{H}$  NMR (600 MHz,  $\text{CDCl}_3$ ):  $\delta$  = 7.59 (d,  $J$  = 8.0 Hz, 2H, PhH), 7.35 (d,  $J$  = 7.9 Hz, 2H, PhH), 4.85–4.79 (m, 2H,  $\text{NCH}_2$ ), 4.04–3.60 (m, 4H,  $\text{NCH}_2\text{CH}_2$ ), 3.58–3.53 (m, H, CH), 2.74–2.42 (m, 2H,  $\text{CH}_2$ ), 1.01–1.00 (m, 3H,  $\text{CH}_3$ );  $^{13}\text{C}$  NMR (150 MHz,  $\text{CDCl}_3$ ):  $\delta$  = 167.8, 150.4, 140.5, 132.7, 128.4, 118.3, 112.2, 111.6, 54.8, 50.4, 41.1, 38.5, 29.3, 19.2; HRMS (ESI)  $m/z$ . calcd for  $\text{C}_{16}\text{H}_{17}\text{N}_4\text{O}_3$   $[\text{M}+\text{H}]^+$ , 313.1295; found, 313.1292.

**X-ray Structure and Data<sup>3</sup> of 4j**

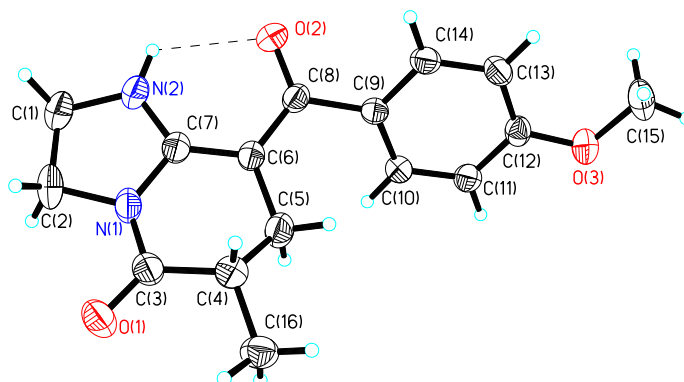

**Figure 1** X-Ray crystal structure of **4j**

**Table 1.** Crystal data and structure refinement for **4j**.

|                                   |                                                                                                                                          |
|-----------------------------------|------------------------------------------------------------------------------------------------------------------------------------------|
| Empirical formula                 | C <sub>16</sub> H <sub>18</sub> N <sub>2</sub> O <sub>3</sub>                                                                            |
| Formula weight                    | 286.32                                                                                                                                   |
| Temperature                       | 293(2) K                                                                                                                                 |
| Wavelength                        | 0.71073 Å                                                                                                                                |
| Crystal system, space group       | Triclinic, P-1                                                                                                                           |
| Unit cell dimensions              | a = 7.3821(12) Å    alpha = 94.965(2) deg.<br>b = 9.8440(17) Å    beta = 103.154(2) deg.<br>c = 10.9083(18) Å    gamma = 109.687(2) deg. |
| Volume                            | 715.2(2) Å <sup>3</sup>                                                                                                                  |
| Z, Calculated density             | 2, 1.330 Mg/m <sup>3</sup>                                                                                                               |
| Absorption coefficient            | 0.093 mm <sup>-1</sup>                                                                                                                   |
| F(000)                            | 304                                                                                                                                      |
| Crystal size                      | 0.30 x 0.20 x 0.18 mm                                                                                                                    |
| Theta range for data collection   | 1.95 to 25.15 deg.                                                                                                                       |
| Limiting indices                  | -8 ≤ h ≤ 8, -11 ≤ k ≤ 11, -13 ≤ l ≤ 13                                                                                                   |
| Reflections collected / unique    | 5725 / 2541 [R(int) = 0.0249]                                                                                                            |
| Completeness to theta = 25.15     | 99.6 %                                                                                                                                   |
| Max. and min. transmission        | 0.9835 and 0.9727                                                                                                                        |
| Refinement method                 | Full-matrix least-squares on F <sup>2</sup>                                                                                              |
| Data / restraints / parameters    | 2541 / 0 / 192                                                                                                                           |
| Goodness-of-fit on F <sup>2</sup> | 1.071                                                                                                                                    |
| Final R indices [I > 2σ(I)]       | R1 = 0.0633, wR2 = 0.1611                                                                                                                |
| R indices (all data)              | R1 = 0.0978, wR2 = 0.1910                                                                                                                |
| Largest diff. peak and hole       | 0.384 and -0.213 e.Å <sup>-3</sup>                                                                                                       |

**Table 2.** Bond lengths [Å] and angles [deg] for **4j**

|            |          |                  |          |
|------------|----------|------------------|----------|
| N(1)-C(3)  | 1.368(4) | N(1)-C(2)-H(2B)  | 111.2    |
| N(1)-C(7)  | 1.399(4) | C(1)-C(2)-H(2B)  | 111.2    |
| N(1)-C(2)  | 1.474(4) | H(2A)-C(2)-H(2B) | 109.1    |
| N(2)-C(7)  | 1.332(4) | O(1)-C(3)-N(1)   | 120.4(3) |
| N(2)-C(1)  | 1.447(5) | O(1)-C(3)-C(4)   | 124.5(4) |
| N(2)-H(2)  | 0.8600   | N(1)-C(3)-C(4)   | 115.0(3) |
| O(1)-C(3)  | 1.226(4) | C(5)-C(4)-C(16)  | 115.1(3) |
| O(2)-C(8)  | 1.253(4) | C(5)-C(4)-C(3)   | 113.4(3) |
| O(3)-C(12) | 1.366(4) | C(16)-C(4)-C(3)  | 113.5(3) |
| O(3)-C(15) | 1.429(4) | C(5)-C(4)-H(4)   | 104.4    |
| C(1)-C(2)  | 1.535(6) | C(16)-C(4)-H(4)  | 104.4    |
| C(1)-H(1A) | 0.9700   | C(3)-C(4)-H(4)   | 104.4    |
| C(1)-H(1B) | 0.9700   | C(4)-C(5)-C(6)   | 115.7(3) |
| C(2)-H(2A) | 0.9700   | C(4)-C(5)-H(5A)  | 108.4    |
| C(2)-H(2B) | 0.9700   | C(6)-C(5)-H(5A)  | 108.4    |
| C(3)-C(4)  | 1.509(5) | C(4)-C(5)-H(5B)  | 108.4    |
| C(4)-C(5)  | 1.463(5) | C(6)-C(5)-H(5B)  | 108.4    |
| C(4)-C(16) | 1.501(5) | H(5A)-C(5)-H(5B) | 107.4    |
| C(4)-H(4)  | 0.9800   | C(7)-C(6)-C(8)   | 119.8(3) |



|                  |          |                     |          |
|------------------|----------|---------------------|----------|
| C(5)-C(6)        | 1.517(4) | C(7)-C(6)-C(5)      | 115.3(3) |
| C(5)-H(5A)       | 0.9700   | C(8)-C(6)-C(5)      | 124.9(3) |
| C(5)-H(5B)       | 0.9700   | N(2)-C(7)-C(6)      | 130.9(3) |
| C(6)-C(7)        | 1.374(4) | N(2)-C(7)-N(1)      | 107.9(3) |
| C(6)-C(8)        | 1.426(4) | C(6)-C(7)-N(1)      | 121.1(3) |
| C(8)-C(9)        | 1.506(4) | O(2)-C(8)-C(6)      | 123.1(3) |
| C(9)-C(14)       | 1.387(4) | O(2)-C(8)-C(9)      | 117.5(3) |
| C(9)-C(10)       | 1.393(4) | C(6)-C(8)-C(9)      | 119.4(3) |
| C(10)-C(11)      | 1.371(4) | C(14)-C(9)-C(10)    | 117.5(3) |
| C(10)-H(10)      | 0.9300   | C(14)-C(9)-C(8)     | 119.6(3) |
| C(11)-C(12)      | 1.383(4) | C(10)-C(9)-C(8)     | 122.9(3) |
| C(11)-H(11)      | 0.9300   | C(11)-C(10)-C(9)    | 121.3(3) |
| C(12)-C(13)      | 1.392(5) | C(11)-C(10)-H(10)   | 119.3    |
| C(13)-C(14)      | 1.382(4) | C(9)-C(10)-H(10)    | 119.3    |
| C(13)-H(13)      | 0.9300   | C(10)-C(11)-C(12)   | 120.4(3) |
| C(14)-H(14)      | 0.9300   | C(10)-C(11)-H(11)   | 119.8    |
| C(15)-H(15A)     | 0.9600   | C(12)-C(11)-H(11)   | 119.8    |
| C(15)-H(15B)     | 0.9600   | O(3)-C(12)-C(11)    | 116.1(3) |
| C(15)-H(15C)     | 0.9600   | O(3)-C(12)-C(13)    | 124.2(3) |
| C(16)-H(16A)     | 0.9600   | C(11)-C(12)-C(13)   | 119.6(3) |
| C(16)-H(16B)     | 0.9600   | C(14)-C(13)-C(12)   | 119.0(3) |
| C(16)-H(16C)     | 0.9600   | C(14)-C(13)-H(13)   | 120.5    |
| C(3)-N(1)-C(7)   | 124.9(3) | C(12)-C(13)-H(13)   | 120.5    |
| C(3)-N(1)-C(2)   | 123.2(3) | C(13)-C(14)-C(9)    | 122.0(3) |
| C(7)-N(1)-C(2)   | 111.1(3) | C(13)-C(14)-H(14)   | 119.0    |
| C(7)-N(2)-C(1)   | 113.6(3) | C(9)-C(14)-H(14)    | 119.0    |
| C(7)-N(2)-H(2)   | 123.2    | O(3)-C(15)-H(15A)   | 109.5    |
| C(1)-N(2)-H(2)   | 123.2    | O(3)-C(15)-H(15B)   | 109.5    |
| C(12)-O(3)-C(15) | 117.7(3) | H(15A)-C(15)-H(15B) | 109.5    |
| N(2)-C(1)-C(2)   | 103.5(3) | O(3)-C(15)-H(15C)   | 109.5    |
| N(2)-C(1)-H(1A)  | 111.1    | H(15A)-C(15)-H(15C) | 109.5    |
| C(2)-C(1)-H(1A)  | 111.1    | H(15B)-C(15)-H(15C) | 109.5    |
| N(2)-C(1)-H(1B)  | 111.1    | C(4)-C(16)-H(16A)   | 109.5    |
| C(2)-C(1)-H(1B)  | 111.1    | C(4)-C(16)-H(16B)   | 109.5    |
| H(1A)-C(1)-H(1B) | 109.0    | H(16A)-C(16)-H(16B) | 109.5    |
| N(1)-C(2)-C(1)   | 102.8(3) | C(4)-C(16)-H(16C)   | 109.5    |
| N(1)-C(2)-H(2A)  | 111.2    | H(16A)-C(16)-H(16C) | 109.5    |
| C(1)-C(2)-H(2A)  | 111.2    | H(16B)-C(16)-H(16C) | 109.5    |

**Table 3.** Torsion angles [deg] for **4j**.

|                     |           |
|---------------------|-----------|
| C(7)-N(2)-C(1)-C(2) | 10.7(5)   |
| C(3)-N(1)-C(2)-C(1) | 172.1(3)  |
| C(7)-N(1)-C(2)-C(1) | 1.7(4)    |
| N(2)-C(1)-C(2)-N(1) | -6.9(4)   |
| C(7)-N(1)-C(3)-O(1) | 176.2(3)  |
| C(2)-N(1)-C(3)-O(1) | 7.1(5)    |
| C(7)-N(1)-C(3)-C(4) | -0.5(5)   |
| C(2)-N(1)-C(3)-C(4) | -169.6(3) |

|                         |           |
|-------------------------|-----------|
| O(1)-C(3)-C(4)-C(5)     | 153.8(4)  |
| N(1)-C(3)-C(4)-C(5)     | -29.6(5)  |
| O(1)-C(3)-C(4)-C(16)    | 20.0(5)   |
| N(1)-C(3)-C(4)-C(16)    | -163.4(3) |
| C(16)-C(4)-C(5)-C(6)    | 177.5(3)  |
| C(3)-C(4)-C(5)-C(6)     | 44.4(5)   |
| C(4)-C(5)-C(6)-C(7)     | -29.4(5)  |
| C(4)-C(5)-C(6)-C(8)     | 151.3(3)  |
| C(1)-N(2)-C(7)-C(6)     | 167.3(4)  |
| C(1)-N(2)-C(7)-N(1)     | -10.0(4)  |
| C(8)-C(6)-C(7)-N(2)     | 1.2(6)    |
| C(5)-C(6)-C(7)-N(2)     | -178.1(3) |
| C(8)-C(6)-C(7)-N(1)     | 178.2(3)  |
| C(5)-C(6)-C(7)-N(1)     | -1.1(5)   |
| C(3)-N(1)-C(7)-N(2)     | -165.5(3) |
| C(2)-N(1)-C(7)-N(2)     | 4.8(4)    |
| C(3)-N(1)-C(7)-C(6)     | 16.9(5)   |
| C(2)-N(1)-C(7)-C(6)     | -172.8(3) |
| C(7)-C(6)-C(8)-O(2)     | 8.8(5)    |
| C(5)-C(6)-C(8)-O(2)     | -171.9(3) |
| C(7)-C(6)-C(8)-C(9)     | -171.6(3) |
| C(5)-C(6)-C(8)-C(9)     | 7.7(5)    |
| O(2)-C(8)-C(9)-C(14)    | 46.4(4)   |
| C(6)-C(8)-C(9)-C(14)    | -133.2(3) |
| O(2)-C(8)-C(9)-C(10)    | -132.3(3) |
| C(6)-C(8)-C(9)-C(10)    | 48.1(4)   |
| C(14)-C(9)-C(10)-C(11)  | 0.4(4)    |
| C(8)-C(9)-C(10)-C(11)   | 179.1(3)  |
| C(9)-C(10)-C(11)-C(12)  | 2.0(5)    |
| C(15)-O(3)-C(12)-C(11)  | -177.7(3) |
| C(15)-O(3)-C(12)-C(13)  | 0.6(5)    |
| C(10)-C(11)-C(12)-O(3)  | 176.5(3)  |
| C(10)-C(11)-C(12)-C(13) | -1.8(5)   |
| O(3)-C(12)-C(13)-C(14)  | -179.0(3) |
| C(11)-C(12)-C(13)-C(14) | -0.8(5)   |
| C(12)-C(13)-C(14)-C(9)  | 3.3(5)    |
| C(10)-C(9)-C(14)-C(13)  | -3.1(5)   |
| C(8)-C(9)-C(14)-C(13)   | 178.2(3)  |

---

# <sup>1</sup>H NMR and <sup>13</sup>C NMR spectra for compound 3

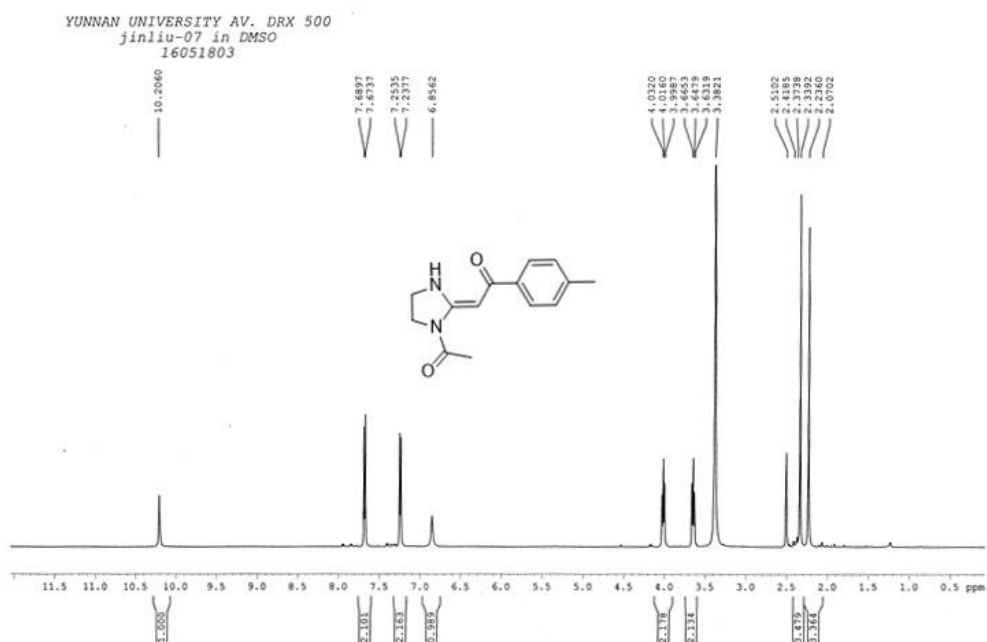

Figure 2a. <sup>1</sup>H NMR (500 MHz, DMSO-*d*<sub>6</sub>) spectra of compound 3

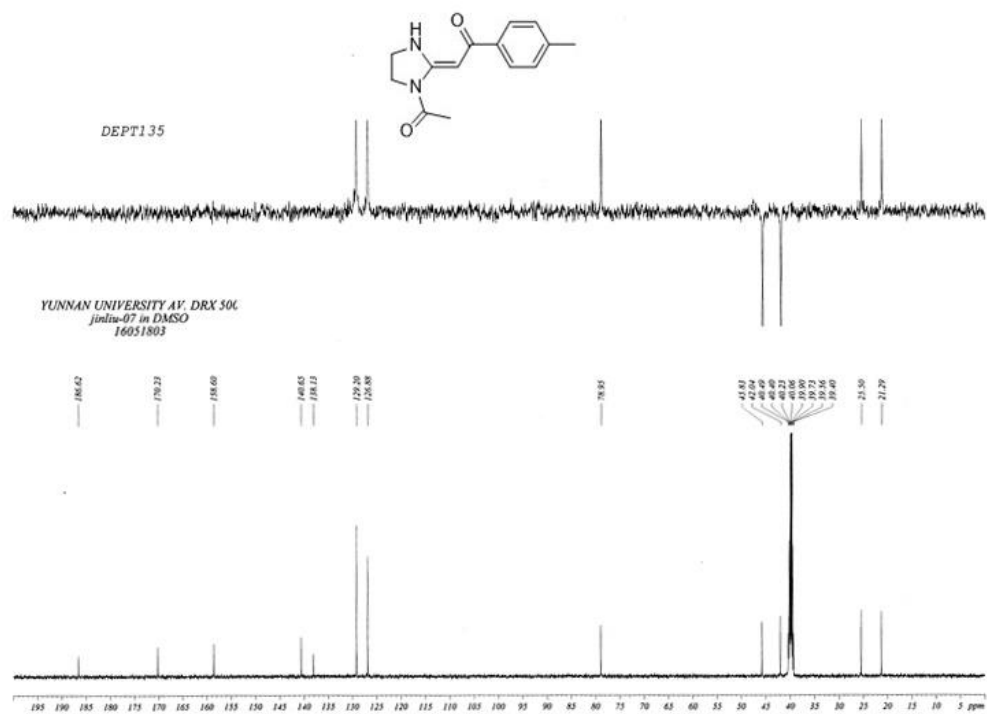

Figure 2b. <sup>13</sup>C NMR (125 MHz, DMSO-*d*<sub>6</sub>) spectra of compound 3

# <sup>1</sup>H NMR and <sup>13</sup>C NMR spectra for bicyclic pyridones 4

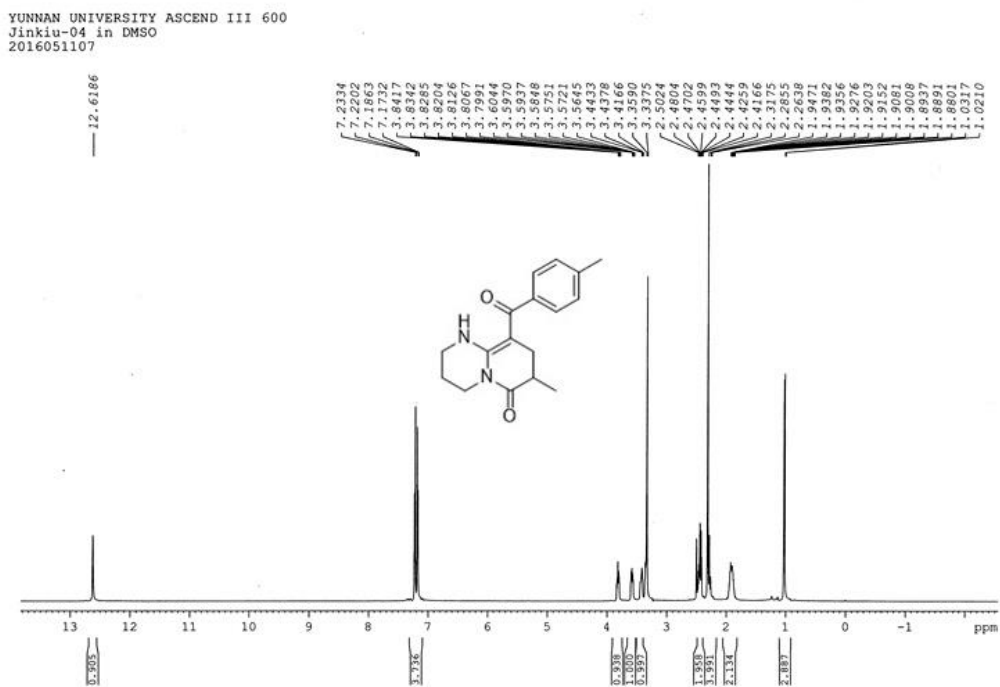



YUNNAN UNIVERSITY ASCEND III 600  
Jinliu in DMSO  
May26-201610

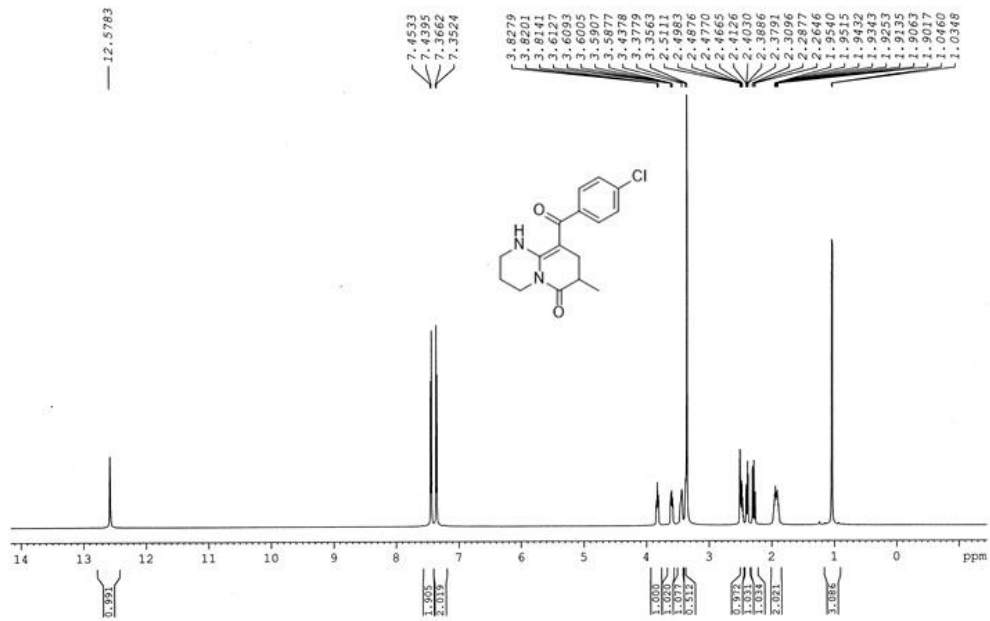

Figure 5a  $^1\text{H}$  NMR (600 MHz,  $\text{DMSO-}d_6$ ) spectra of compound 4c

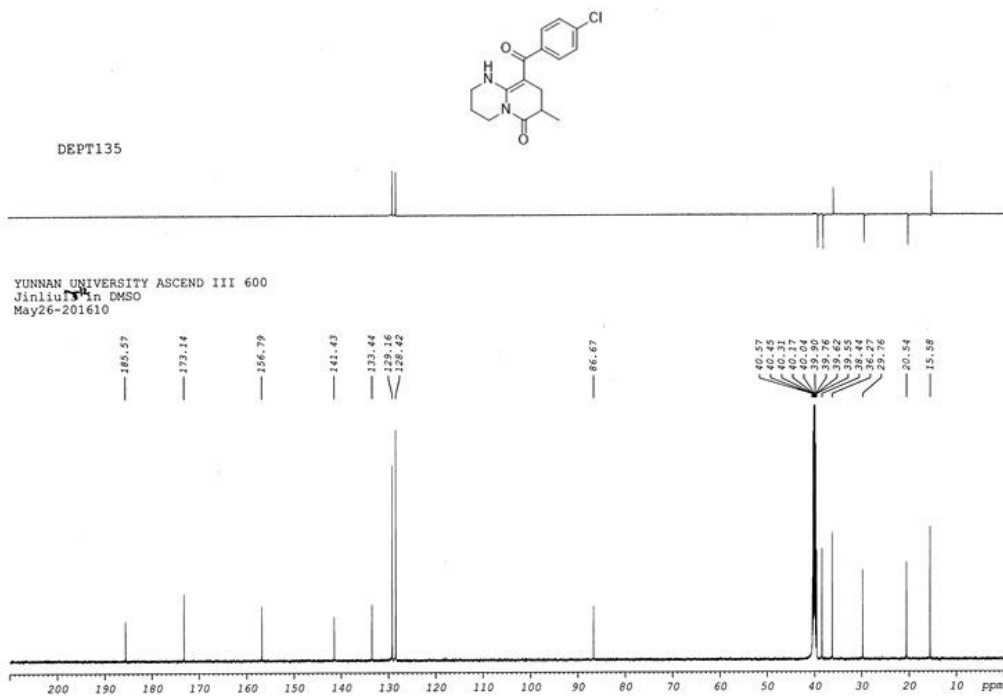

Figure 5b  $^{13}\text{C}$  NMR (150 MHz,  $\text{DMSO-}d_6$ ) spectra of compound 4c

YUNNAN UNIVERSITY ASCEND III 600  
Jinkiu-05 in DMSO  
2016051110

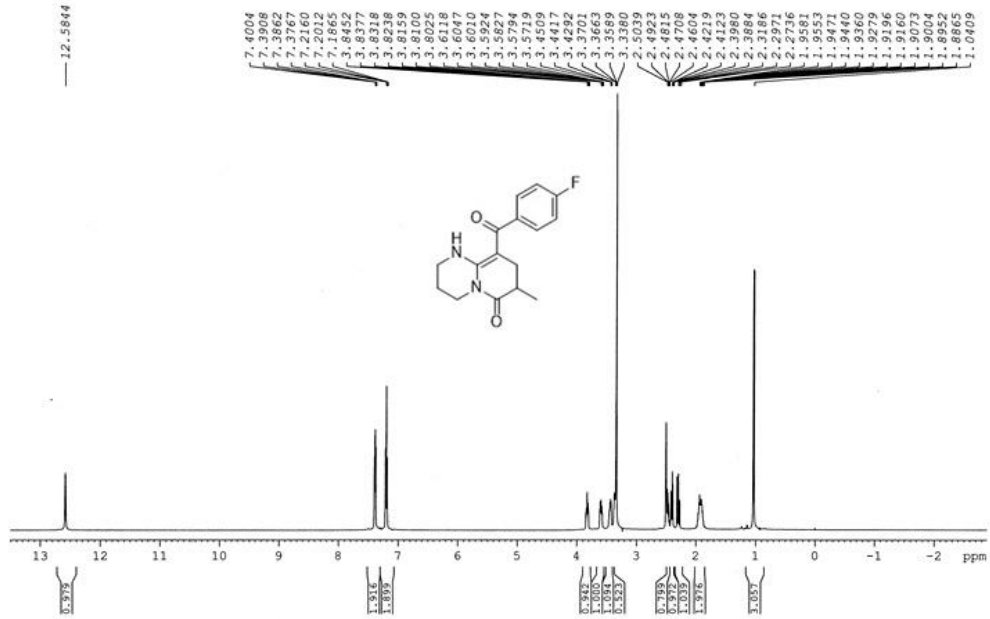

Figure 6a  $^1\text{H}$  NMR (600 MHz,  $\text{DMSO-}d_6$ ) spectra of compound 4d

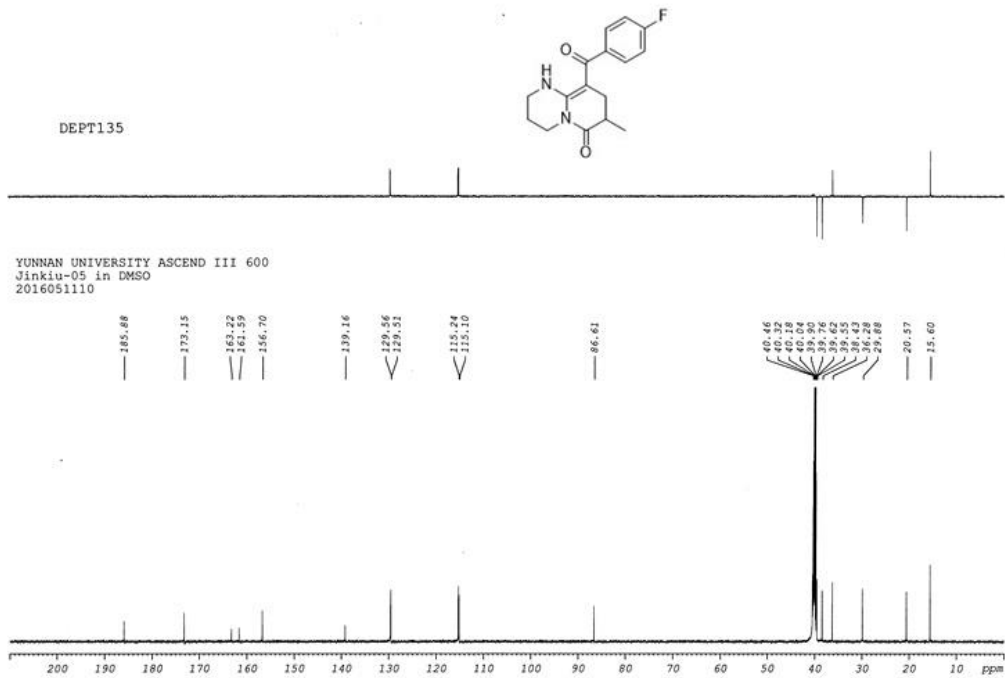

Figure 6b  $^{13}\text{C}$  NMR (150 MHz,  $\text{DMSO-}d_6$ ) spectra of compound 4d

YUNNAN UNIVERSITY ASCEND AVIII 600  
Jinliu-16 in CDCl<sub>3</sub>  
Jun08-2016-liujin01

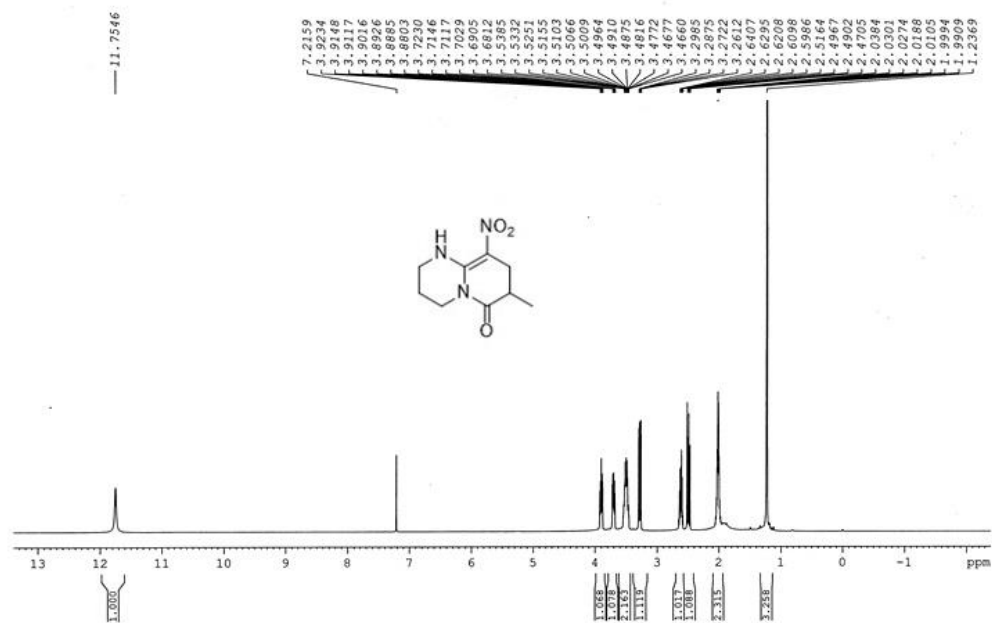

Figure 7a <sup>1</sup>H NMR (600 MHz, CDCl<sub>3</sub>) spectra of compound **4e**

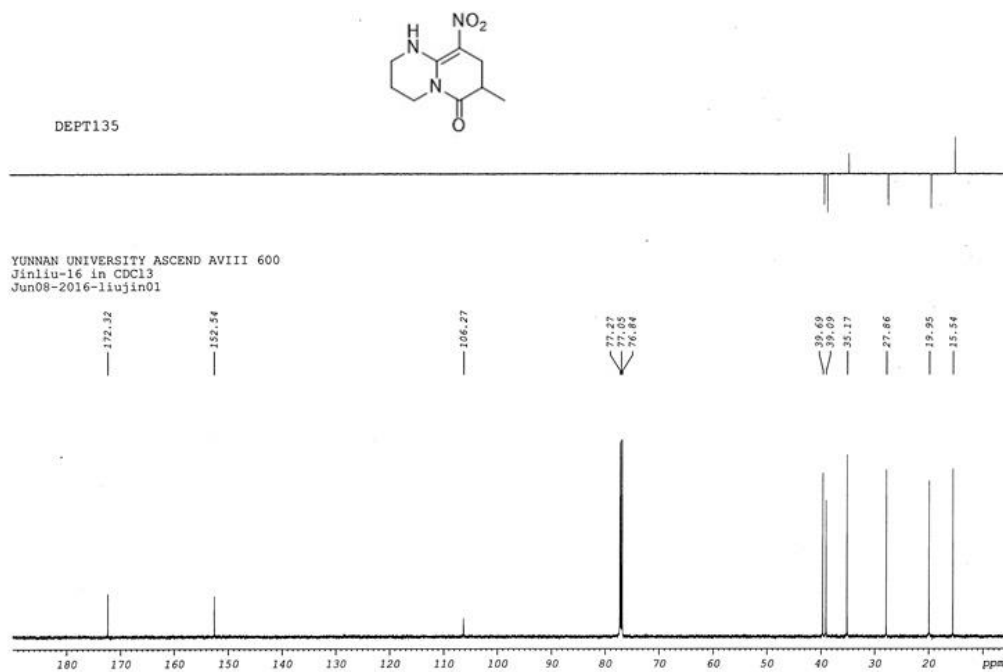

Figure 7b <sup>13</sup>C NMR (150 MHz, CDCl<sub>3</sub>) spectra of compound **4e**



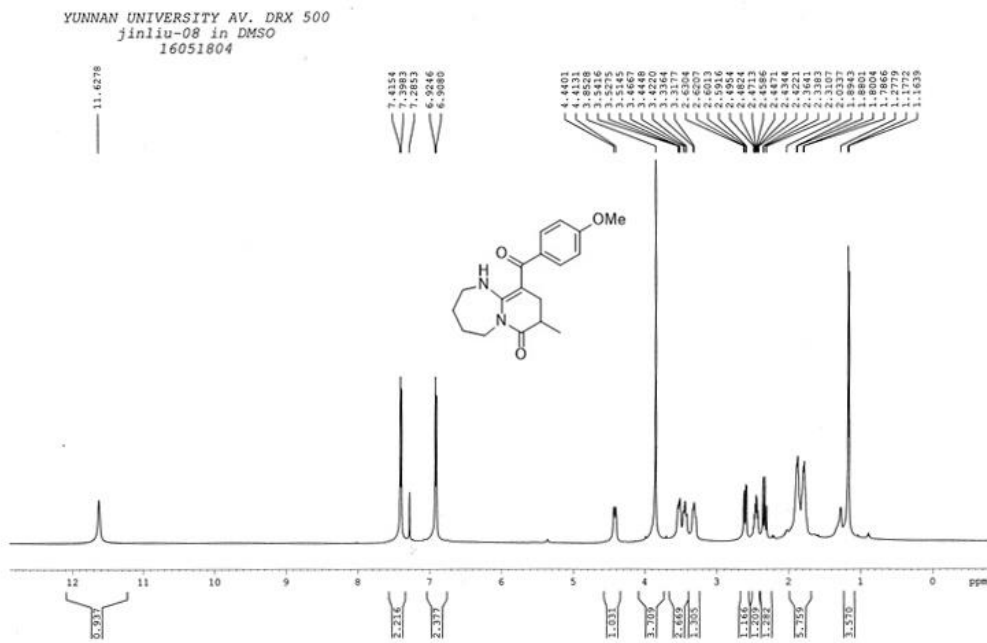

Figure 8a  $^1\text{H}$  NMR (500 MHz,  $\text{DMSO-}d_6$ ) spectra of compound 4f

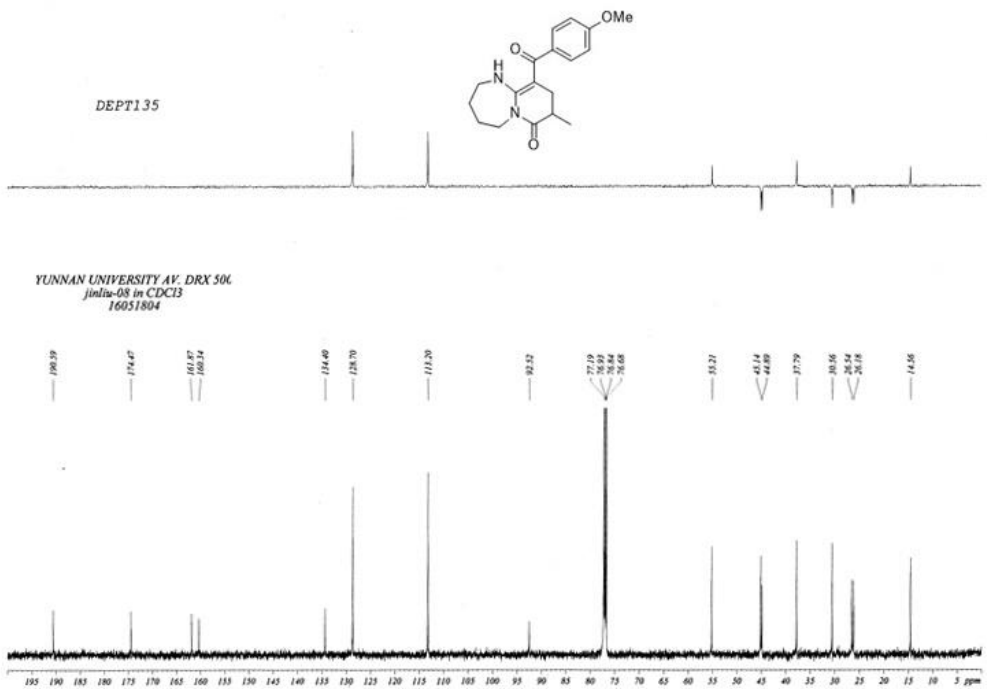

Figure 8b  $^{13}\text{C}$  NMR (125 MHz,  $\text{DMSO-}d_6$ ) spectra of compound 4f

YUNNAN UNIVERSITY ASCEND AVIII 600  
JinLiu31 in CDCl<sub>3</sub>  
Jun16-2016-LJ

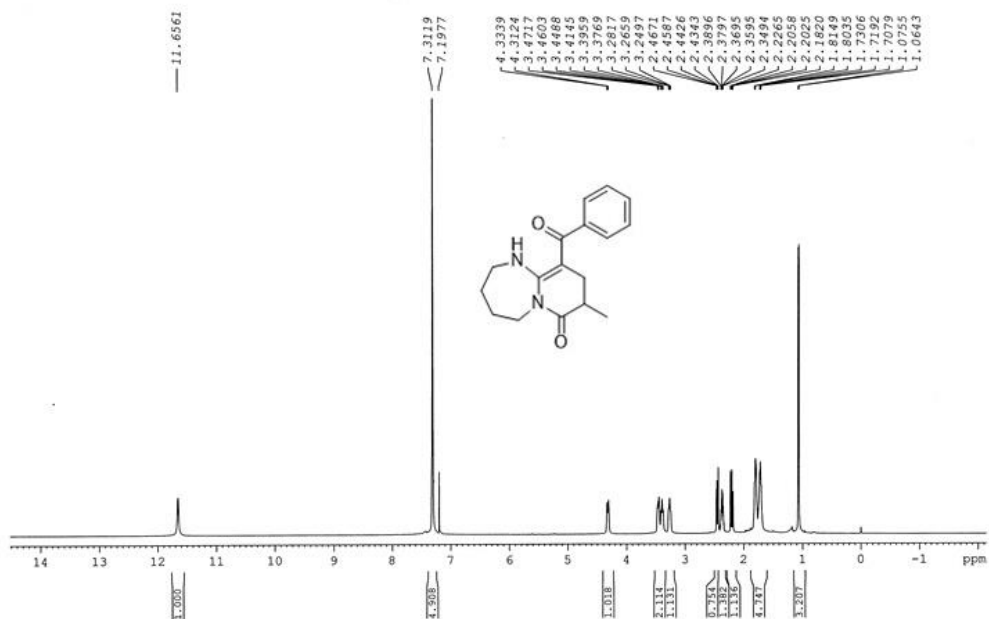

Figure 9a <sup>1</sup>H NMR (600 MHz, CDCl<sub>3</sub>) spectra of compound **4g**

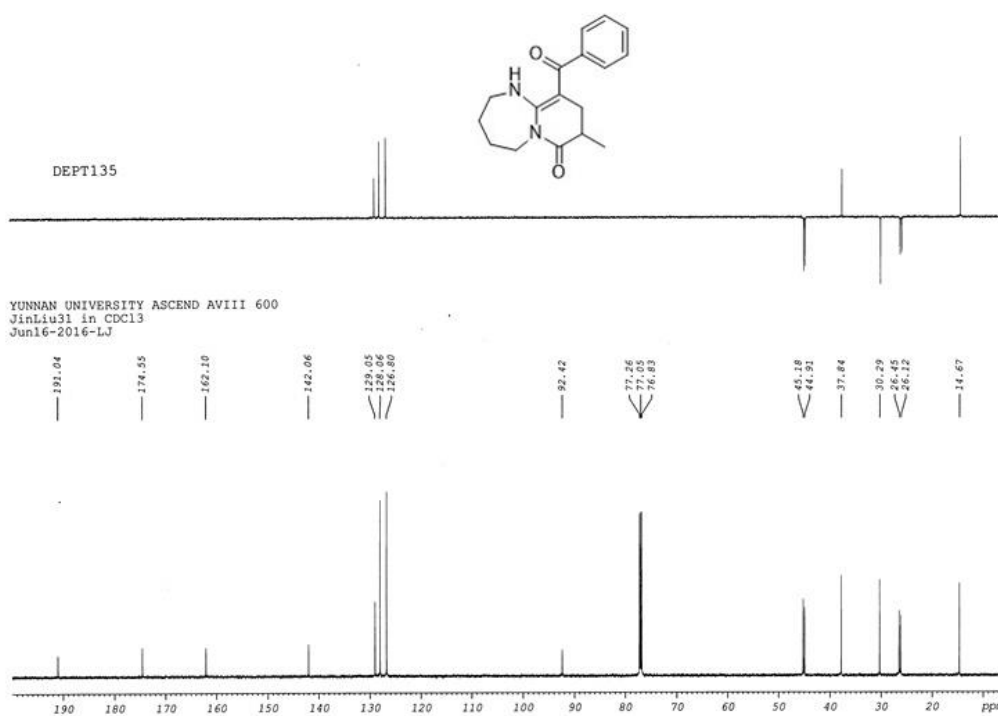

Figure 9b <sup>13</sup>C NMR (150 MHz, CDCl<sub>3</sub>) spectra of compound **4g**

YUNNAN UNIVERSITY ASCEND III 600  
Jinliu-02 inDMSO  
2016050404

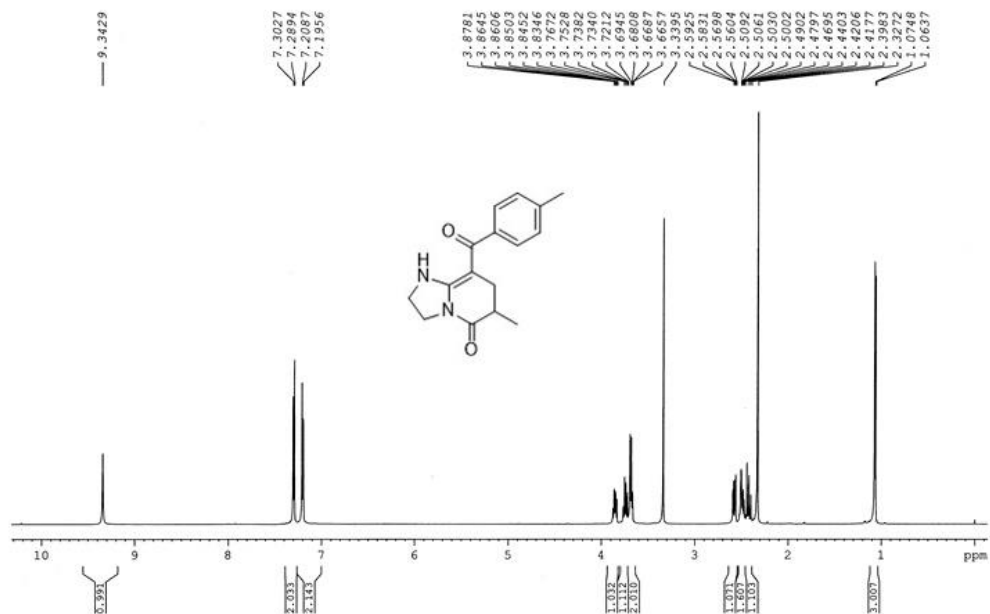

Figure 10a  $^1\text{H}$  NMR (600 MHz,  $\text{DMSO-}d_6$ ) spectra of compound 4h

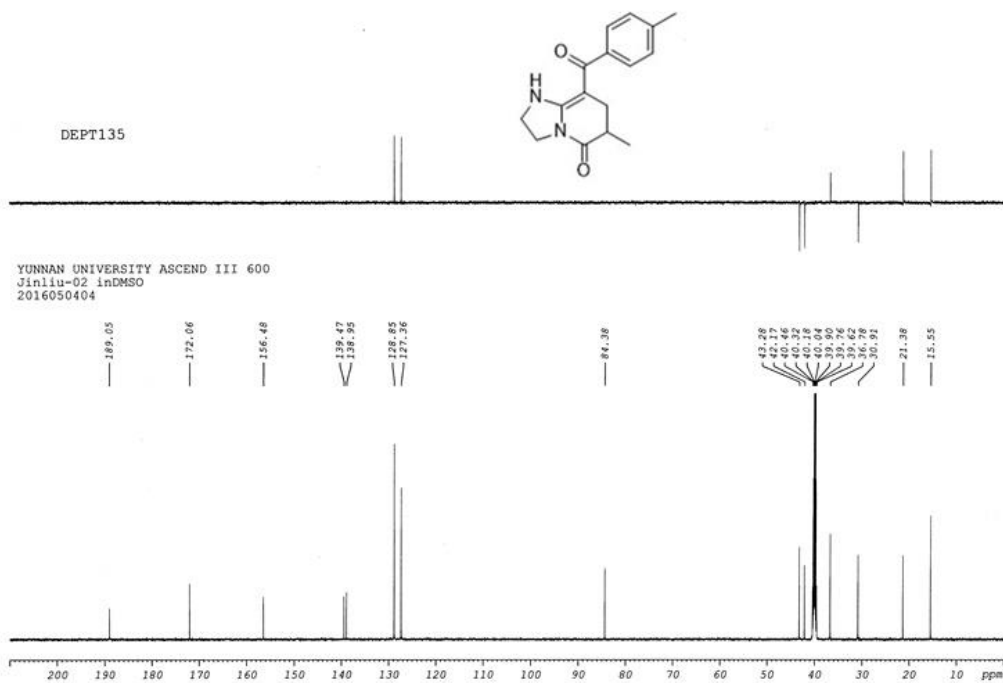

Figure 10b  $^{13}\text{C}$  NMR (150 MHz,  $\text{DMSO-}d_6$ ) spectra of compound 4h

YUNNAN UNIVERSITY ASCEND III 600  
Jinliu in DMSO  
May26-201604

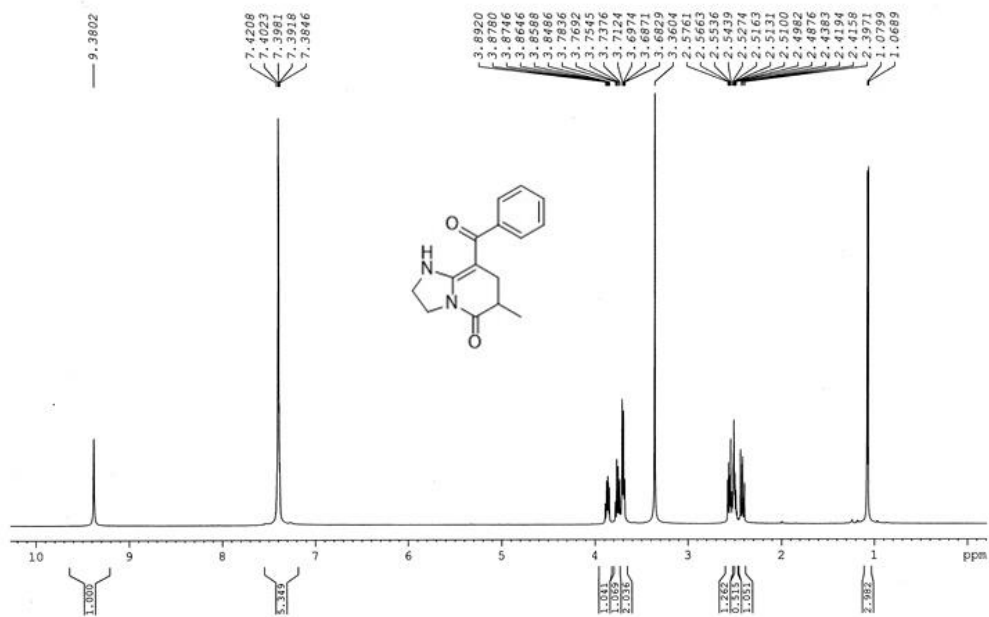

Figure 11a  $^1\text{H}$  NMR (600 MHz,  $\text{DMSO-}d_6$ ) spectra of compound 4i

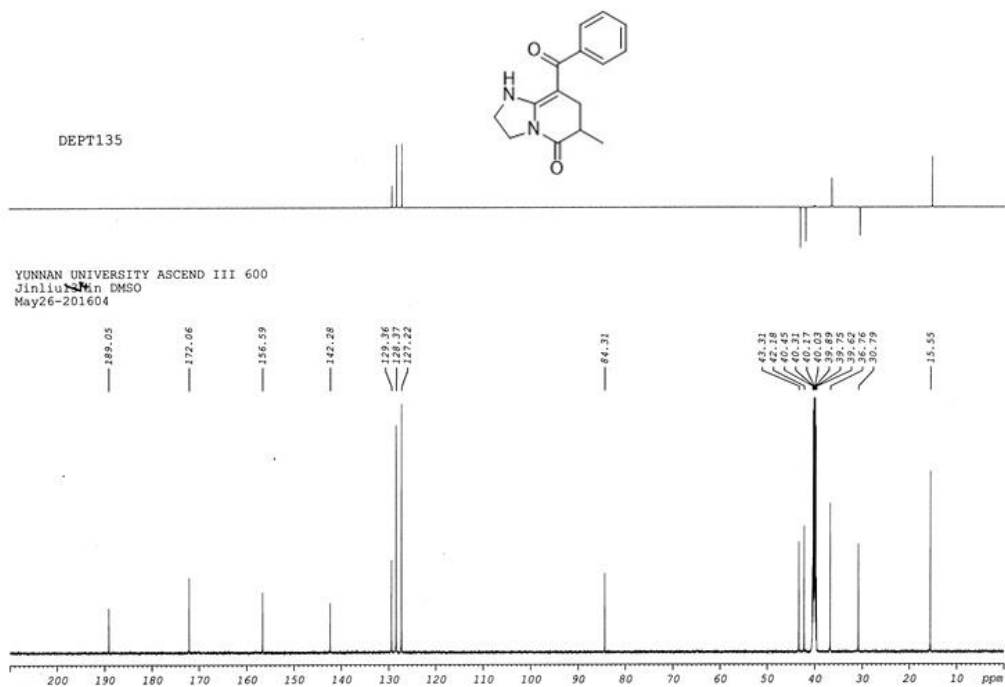

Figure 11b  $^{13}\text{C}$  NMR (150 MHz,  $\text{DMSO-}d_6$ ) spectra of compound 4i

YUNNAN UNIVERSITY ASCEND III 600  
Jinliu in DMSO  
May26-201601

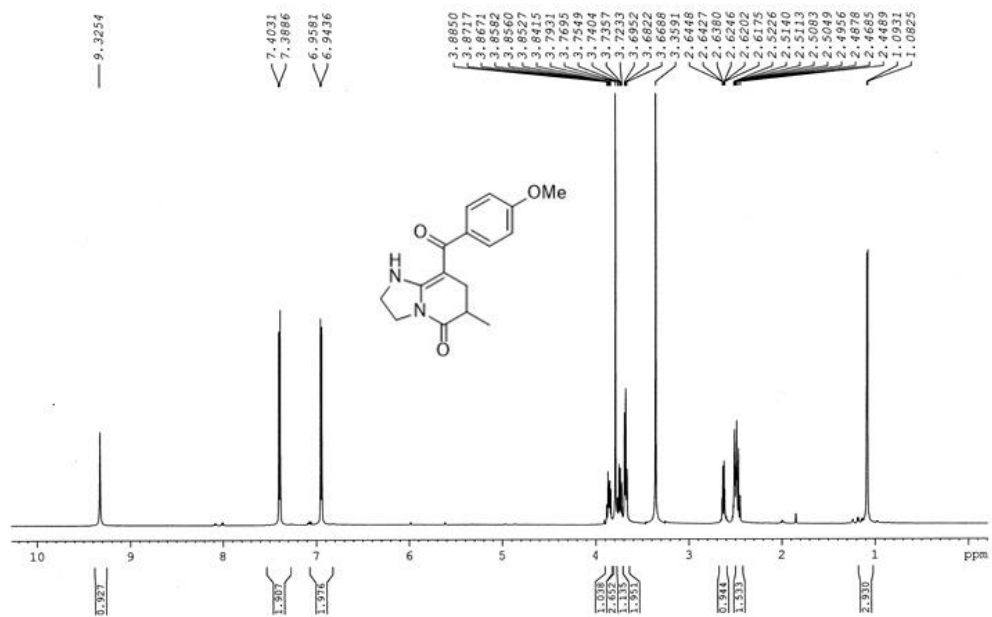

Figure 12a  $^1\text{H}$  NMR (600 MHz,  $\text{DMSO-}d_6$ ) spectra of compound 4j

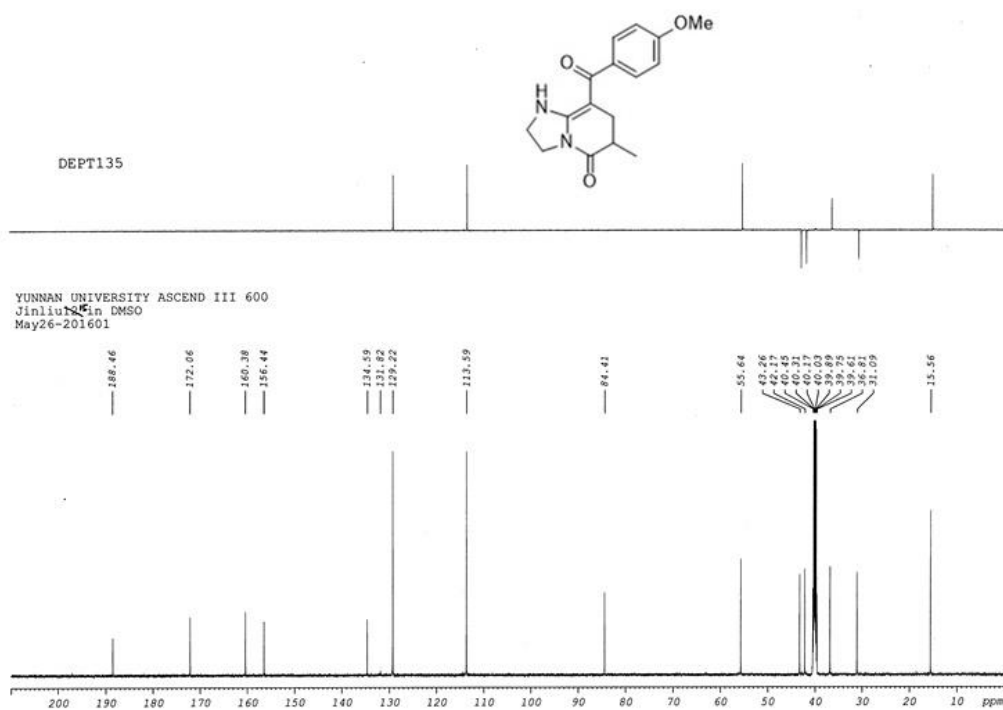

Figure 12b  $^{13}\text{C}$  NMR (150 MHz,  $\text{DMSO-}d_6$ ) spectra of compound 4j

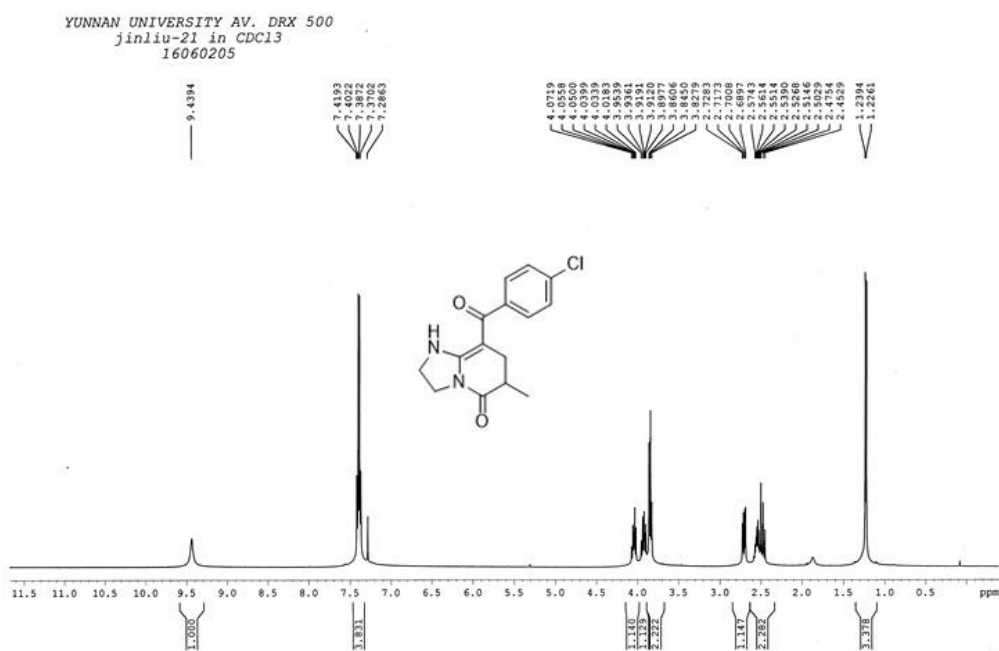

Figure 13a <sup>1</sup>H NMR (500 MHz, CDCl<sub>3</sub>) spectra of compound 4k

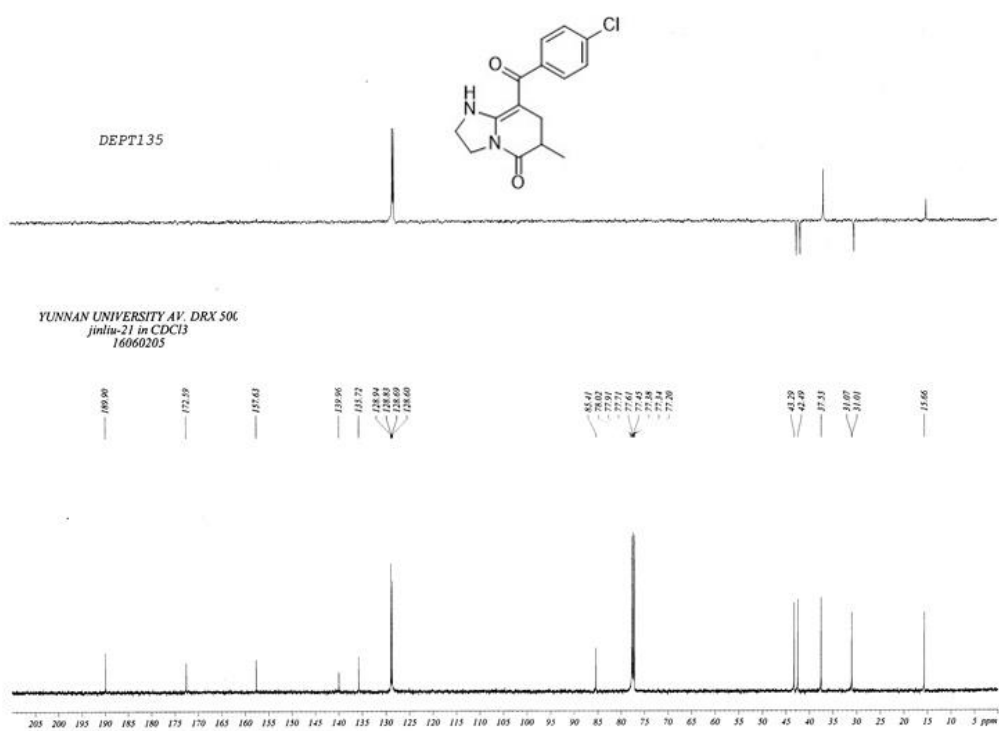

Figure 13b <sup>13</sup>C NMR (125 MHz, CDCl<sub>3</sub>) spectra of compound 4k

YUNNAN UNIVERSITY ASCEND AVIII 600  
Jinliu-23 in CDCl<sub>3</sub>  
Jun08-2016-liujin04

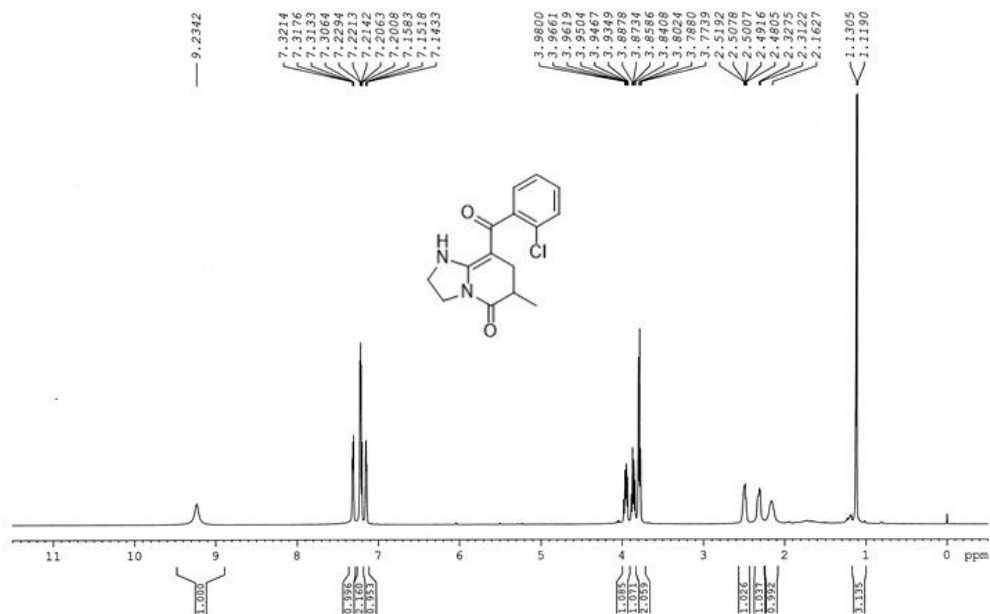

Figure 14a <sup>1</sup>H NMR (600 MHz, CDCl<sub>3</sub>) spectra of compound **4l**

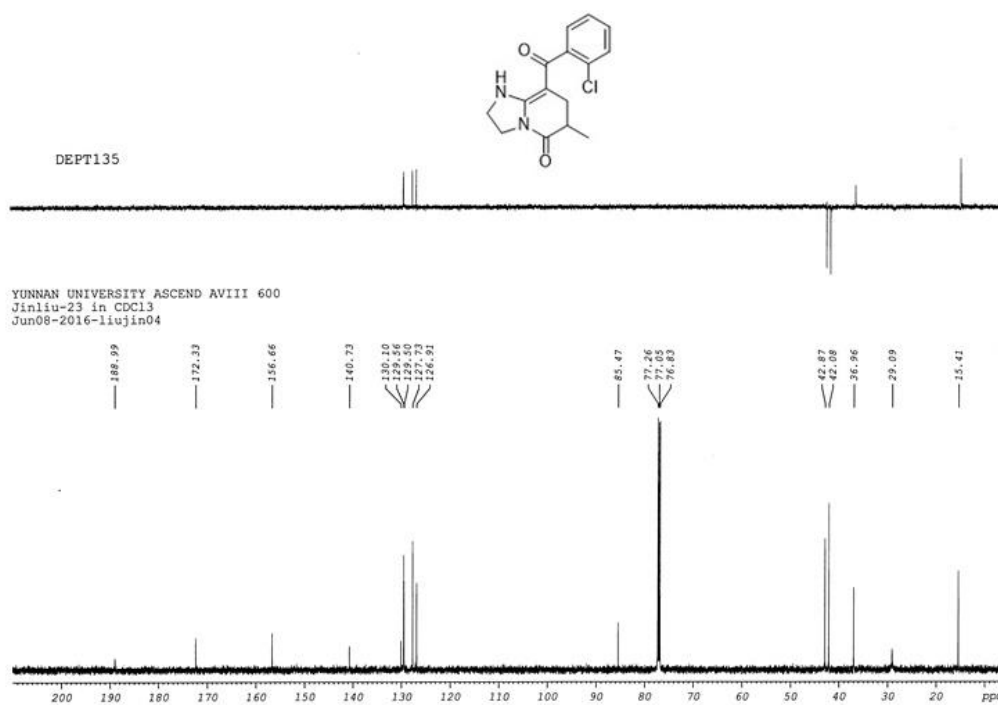

Figure 14b <sup>13</sup>C NMR (150 MHz, CDCl<sub>3</sub>) spectra of compound **4l**

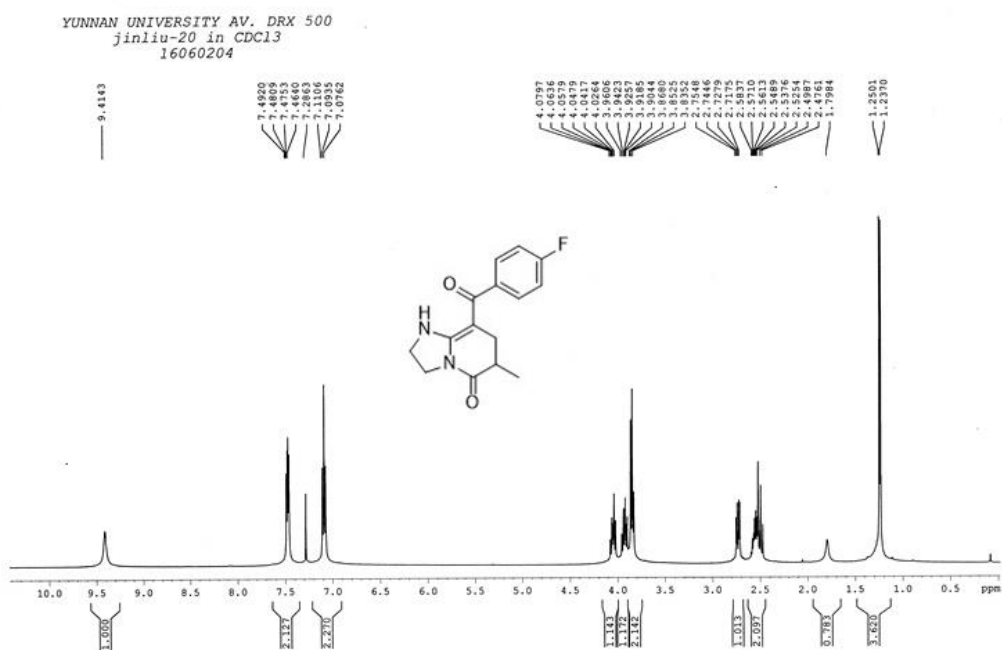

Figure 15a <sup>1</sup>H NMR (500 MHz, CDCl<sub>3</sub>) spectra of compound **4m**

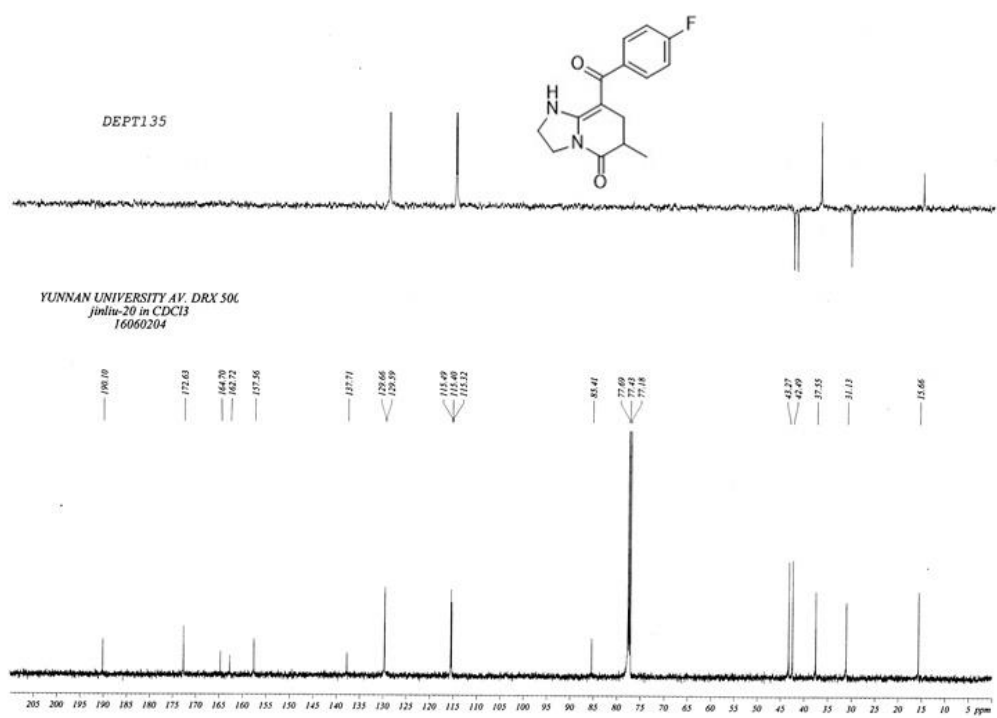

Figure 15b <sup>13</sup>C NMR (125 MHz, CDCl<sub>3</sub>) spectra of compound **4m**



YUNNAN UNIVERSITY ASCEND AVIII 600  
Jinliu-22 in DMSO  
Jun08-2016-liujin10

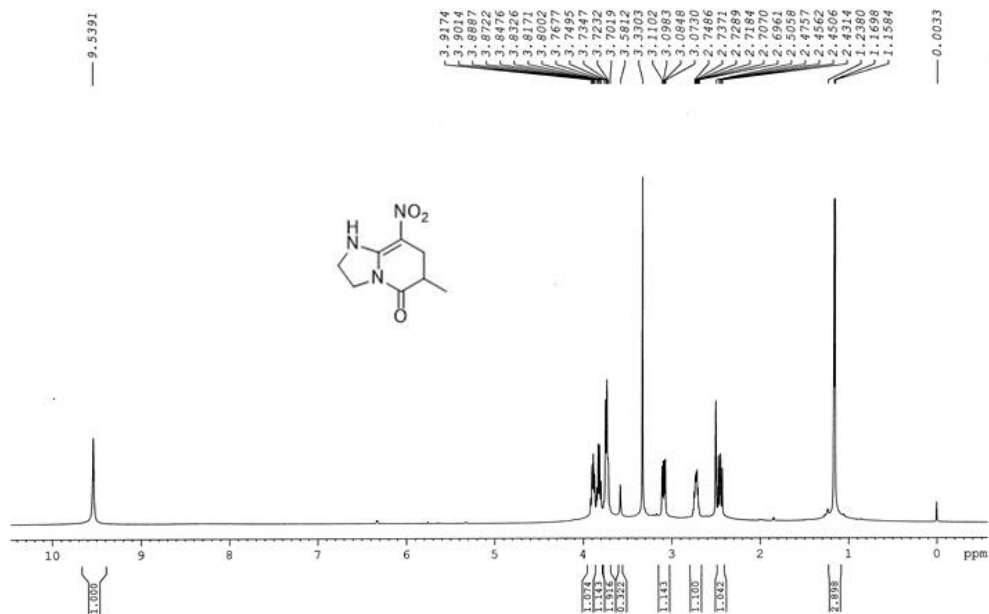

Figure 16a  $^1\text{H NMR}$  (600 MHz,  $\text{DMSO-}d_6$ ) spectra of compound 4n

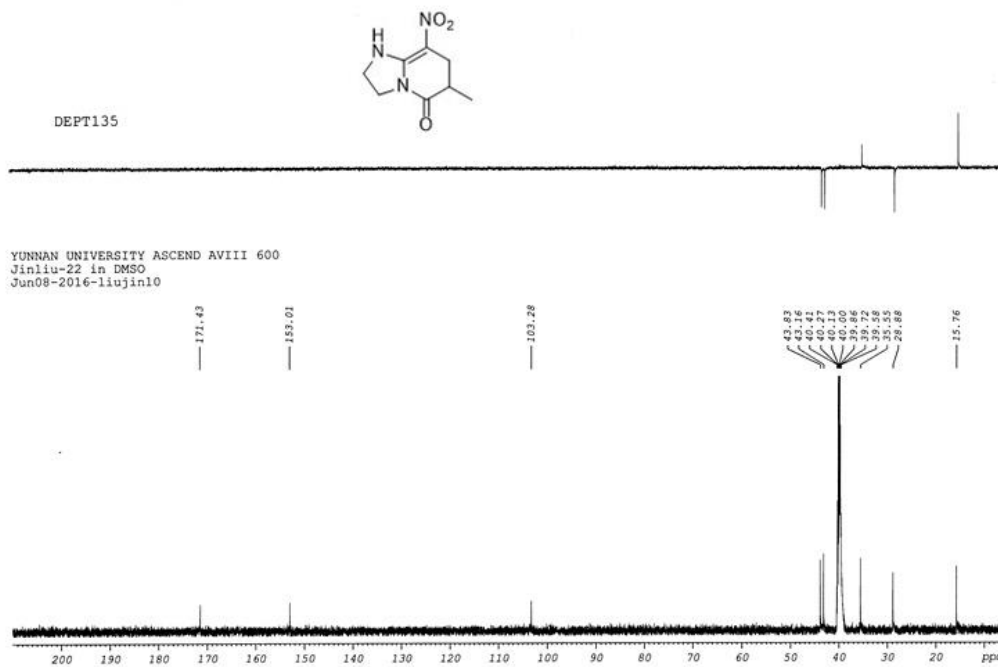

Figure 16b  $^{13}\text{C NMR}$  (150 MHz,  $\text{DMSO-}d_6$ ) spectra of compound 4n

**$^1\text{H}$  NMR and  $^{13}\text{C}$  NMR spectra for bicyclic pyridones 5**

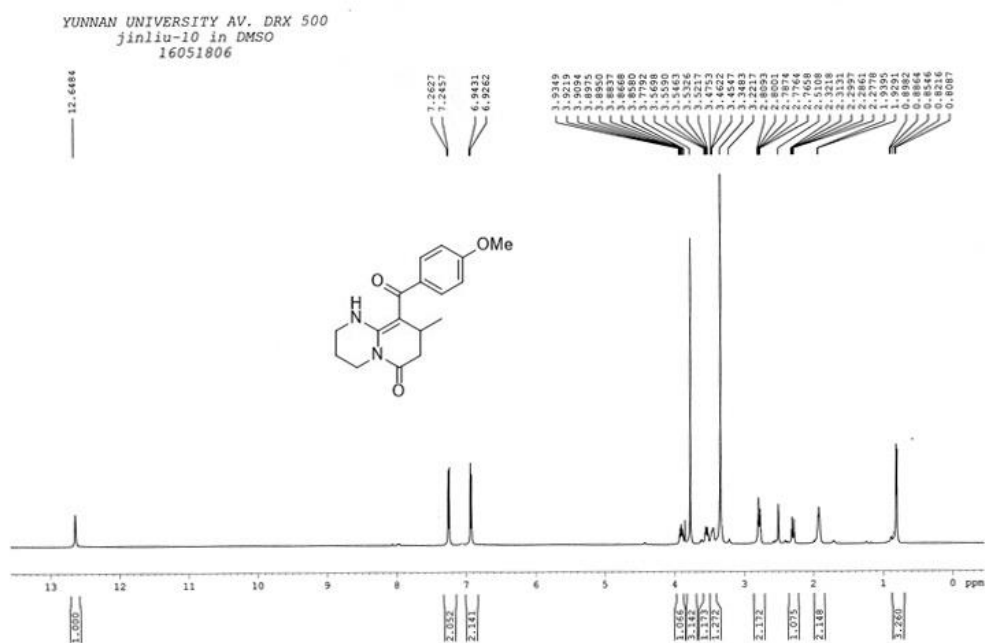

**Figure 17a**  $^1\text{H}$  NMR (500 MHz,  $\text{DMSO-}d_6$ ) spectra of compound **5a**

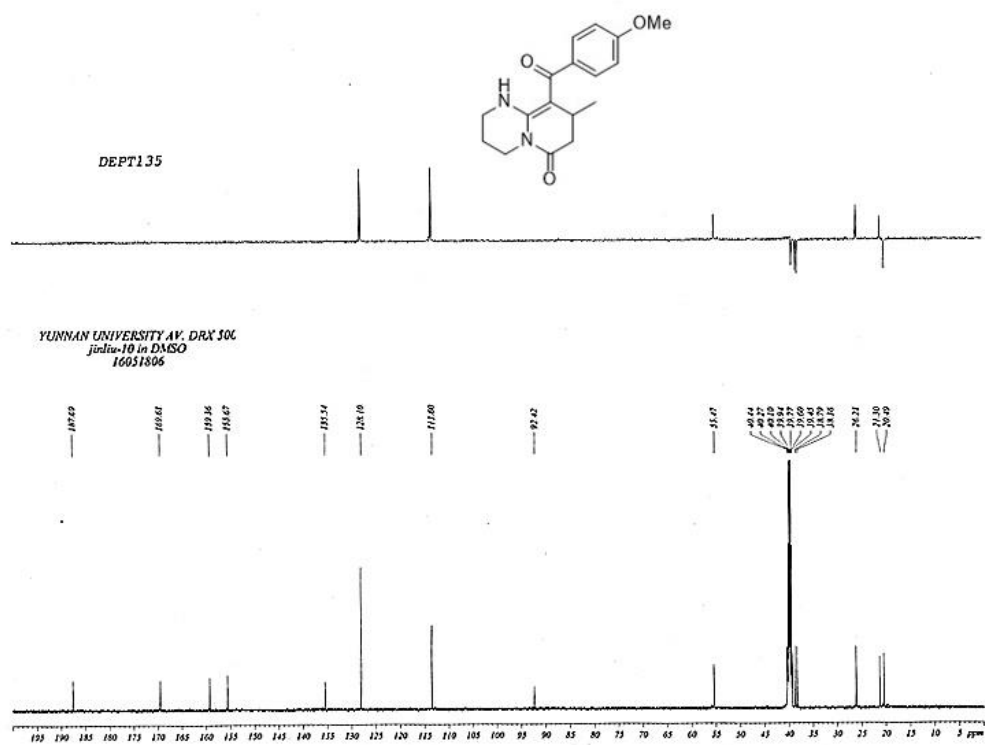

**Figure 17b**  $^{13}\text{C}$  NMR (125 MHz,  $\text{DMSO-}d_6$ ) spectra of compound **5a**

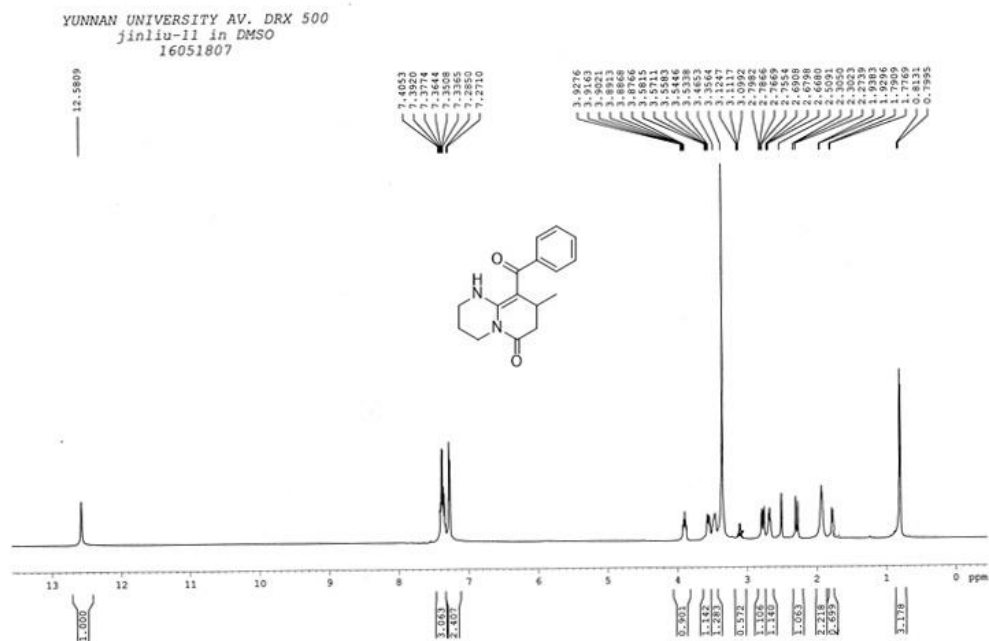

Figure 18a  $^1\text{H}$  NMR (500 MHz,  $\text{DMSO-}d_6$ ) spectra of compound **5b**

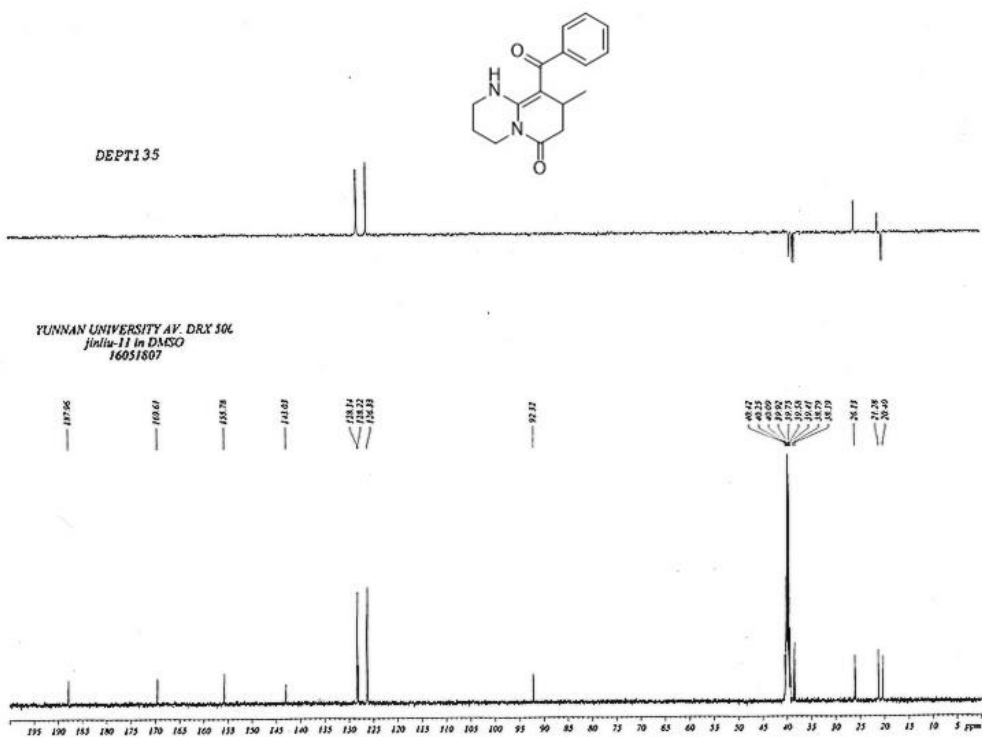

Figure 18b  $^{13}\text{C}$  NMR (125 MHz,  $\text{DMSO-}d_6$ ) spectra of compound **5b**

YUNNAN UNIVERSITY ASCEND AVIII 600  
JinLiu29 in CDCl3  
Jun16-2016-LJ

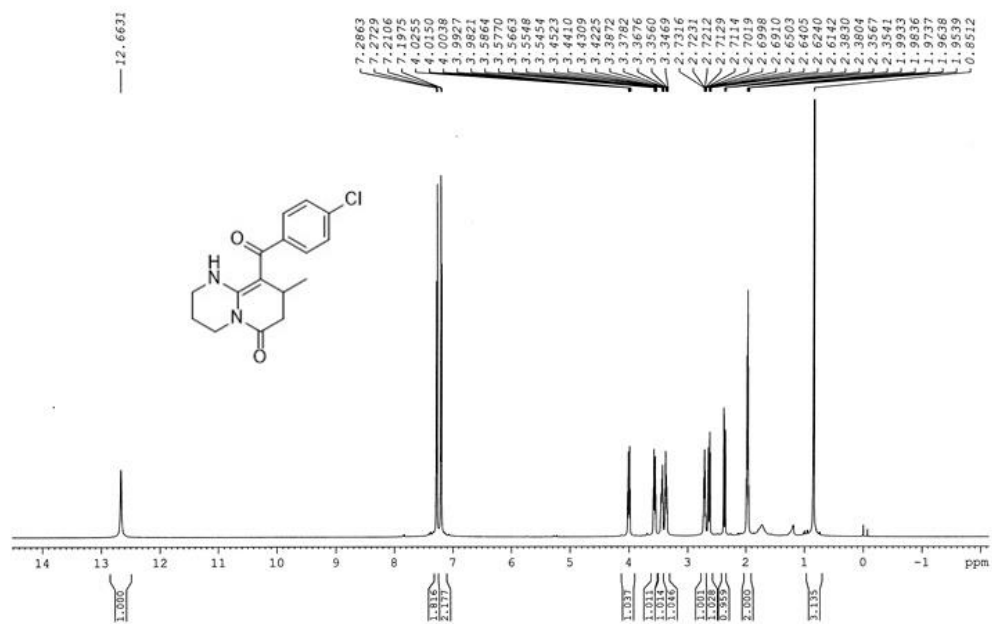

Figure 19a <sup>1</sup>H NMR (600 MHz, CDCl<sub>3</sub>) spectra of compound **5c**

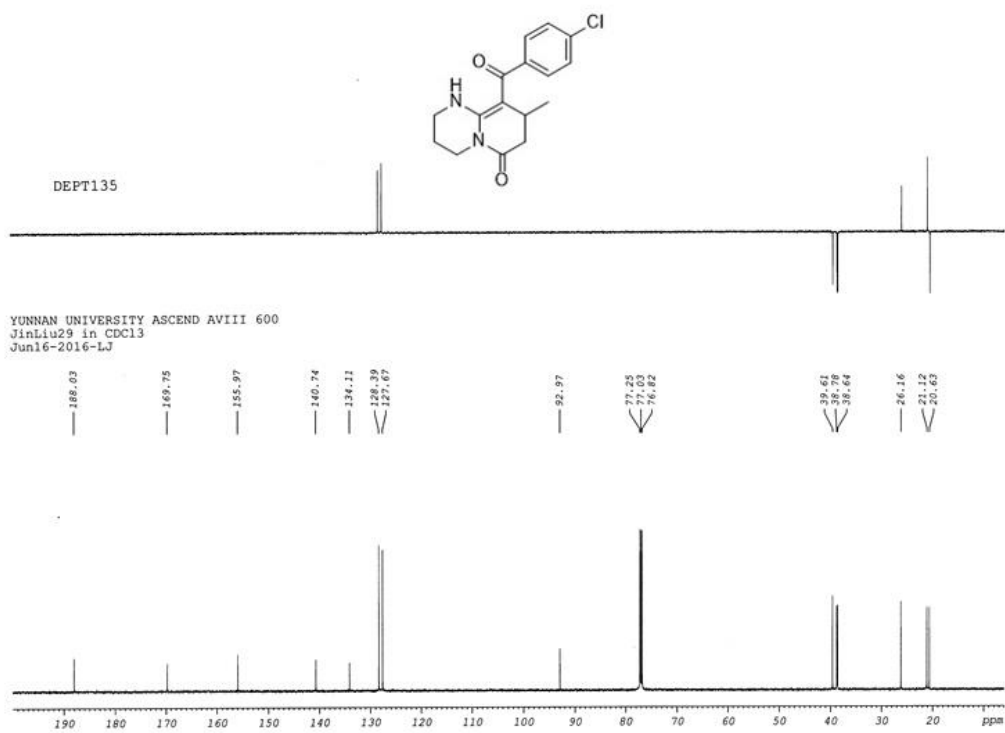

Figure 19b <sup>13</sup>C NMR (150 MHz, CDCl<sub>3</sub>) spectra of compound **5c**

YUNNAN UNIVERSITY ASCEND AVIII 600  
 JinLiu 30-2 IN CDCl<sub>3</sub>  
 Oct11-2016-liujin

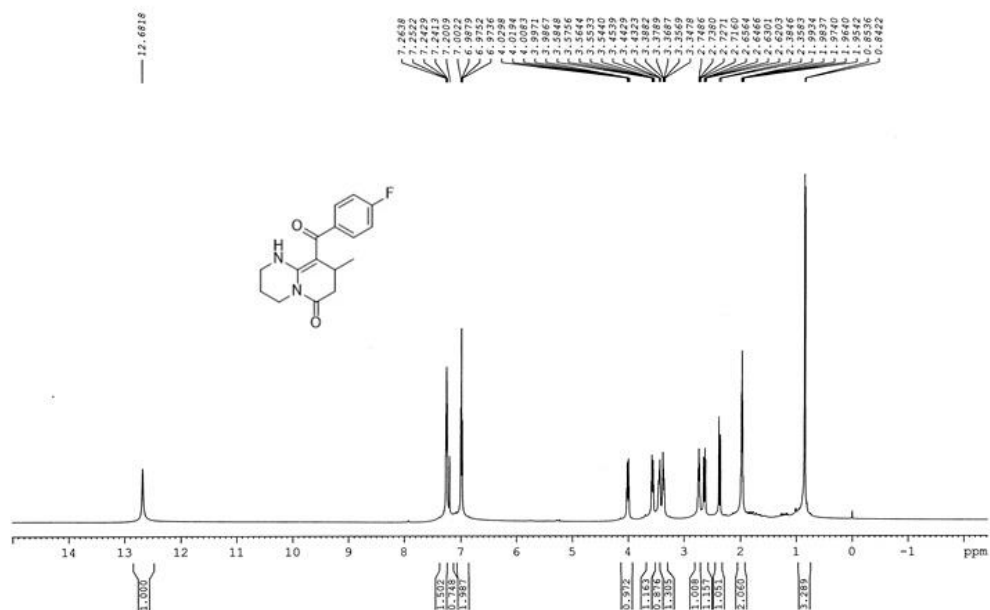

Figure 20a <sup>1</sup>H NMR (600 MHz, CDCl<sub>3</sub>) spectra of compound 5d

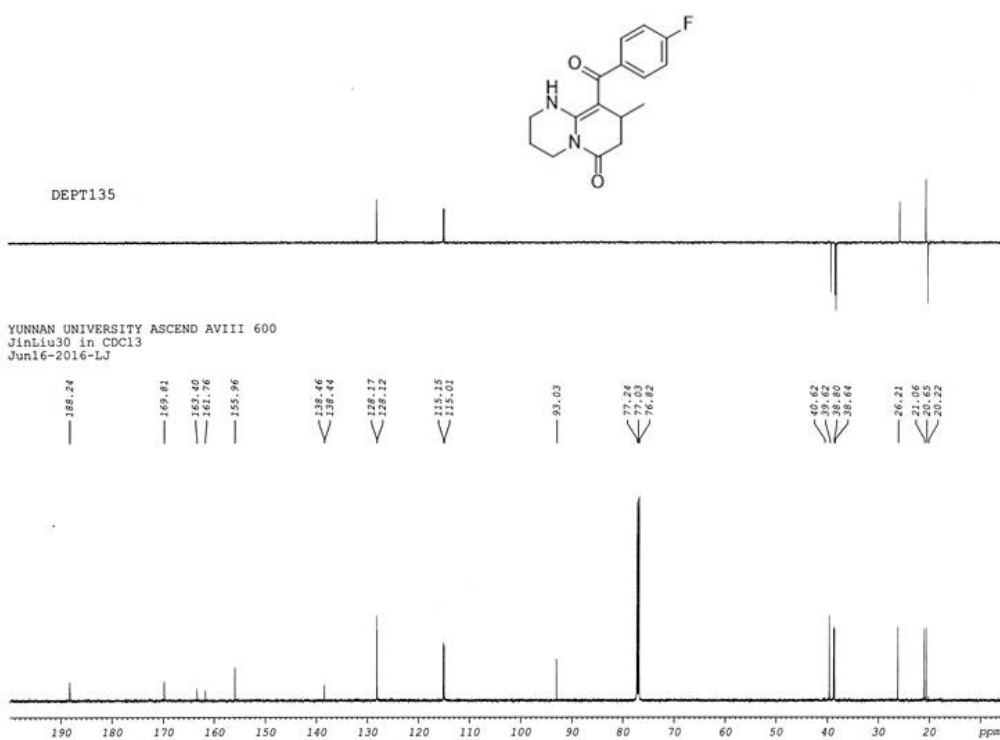

Figure 20b <sup>13</sup>C NMR (150 MHz, CDCl<sub>3</sub>) spectra of compound 5d

YUNNAN UNIVERSITY ASCEND AVIII 600  
JinLiu-33 in CDCl<sub>3</sub>  
Jun20-2016-LJ04

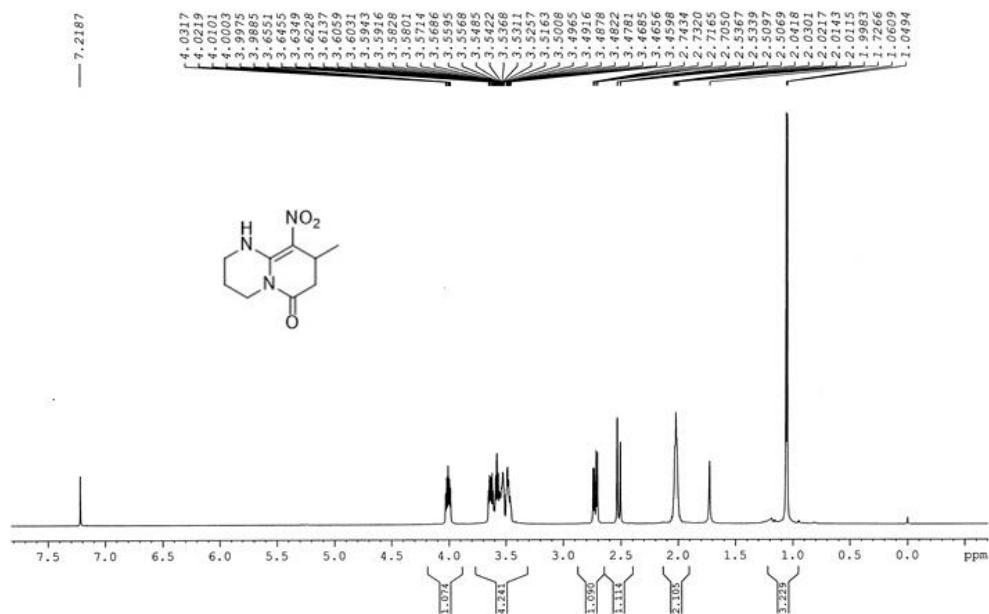

Figure 21a <sup>1</sup>H NMR (600 MHz, CDCl<sub>3</sub>) spectra of compound **5e**

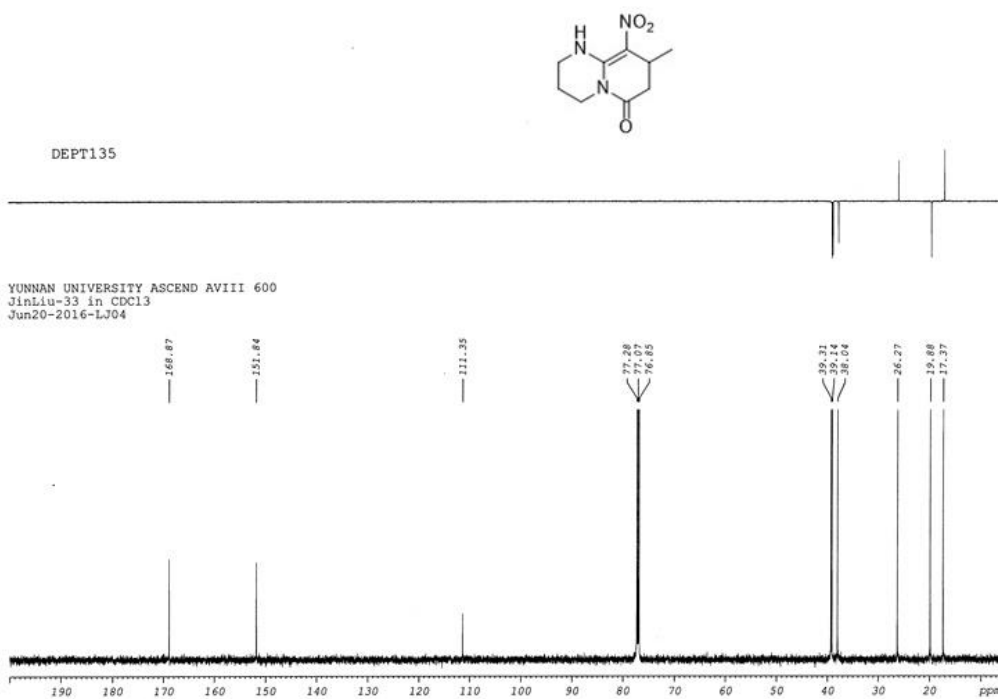

Figure 21b <sup>13</sup>C NMR (150 MHz, CDCl<sub>3</sub>) spectra of compound **5e**

YUNNAN UNIVERSITY ASCEND AVIII 600  
JinLiu28 in CDCl<sub>3</sub>  
Jun16-2016-LJ

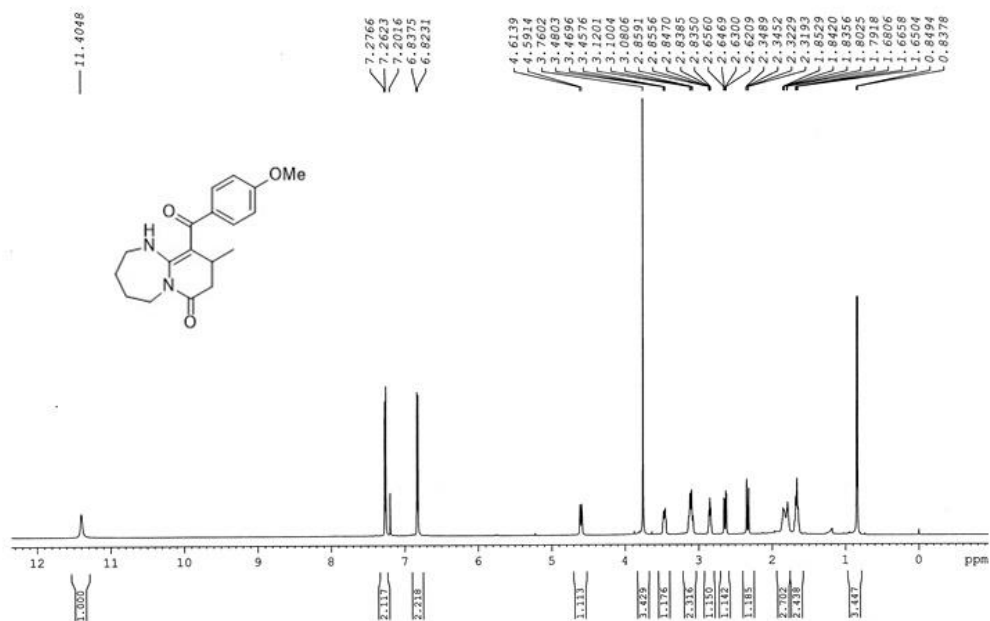

Figure 22a <sup>1</sup>H NMR (600 MHz, CDCl<sub>3</sub>) spectra of compound **5f**

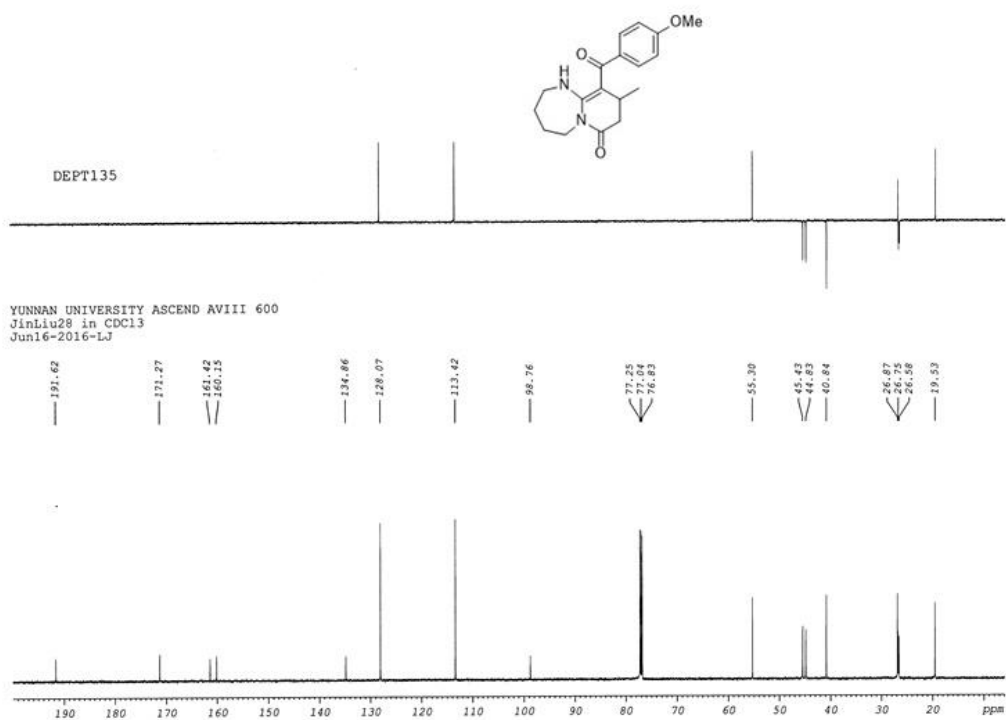

Figure 22b <sup>13</sup>C NMR (150 MHz, CDCl<sub>3</sub>) spectra of compound **5f**

YUNNAN UNIVERSITY ASCEND AVIII 600  
 JinLiu-34 in CDCl<sub>3</sub>+DMSO  
 Jun20-2016-LJ13

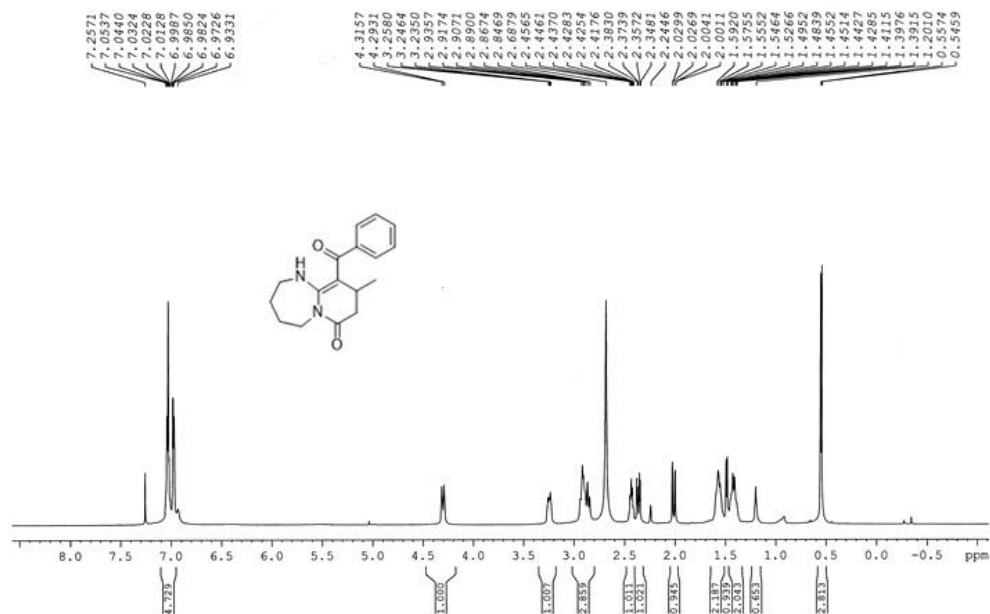

**Figure 23a** <sup>1</sup>H NMR (600 MHz, DMSO-*d*<sub>6</sub>+CDCl<sub>3</sub>) spectra of compound **5g**

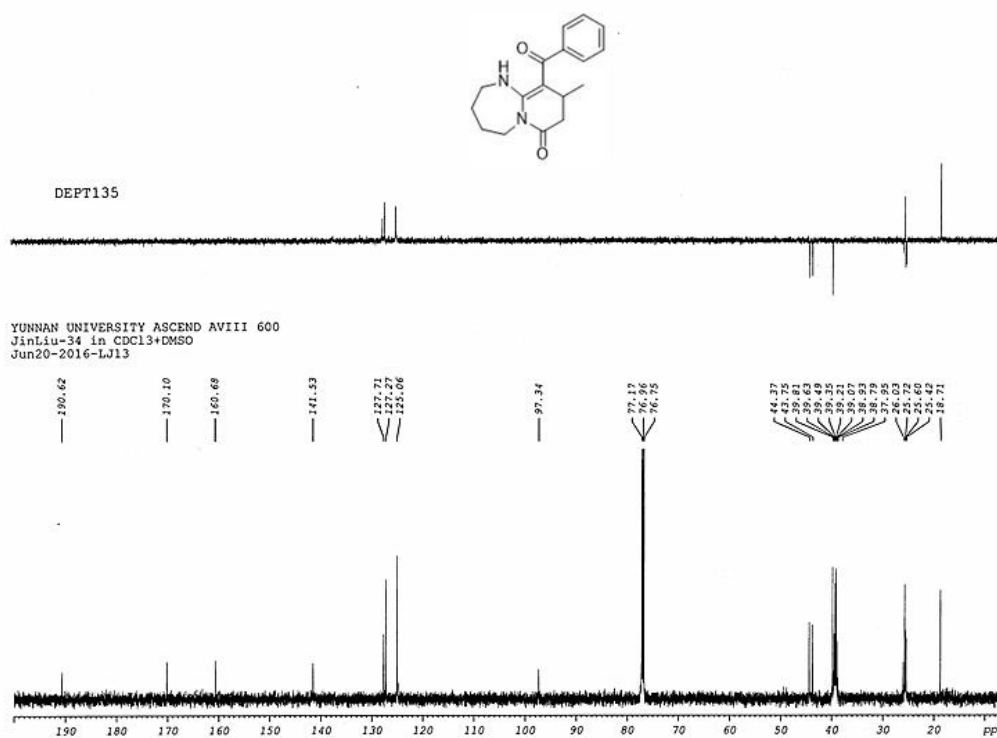

**Figure 23b** <sup>13</sup>C NMR (150 MHz, DMSO-*d*<sub>6</sub>+CDCl<sub>3</sub>) spectra of compound **5g**



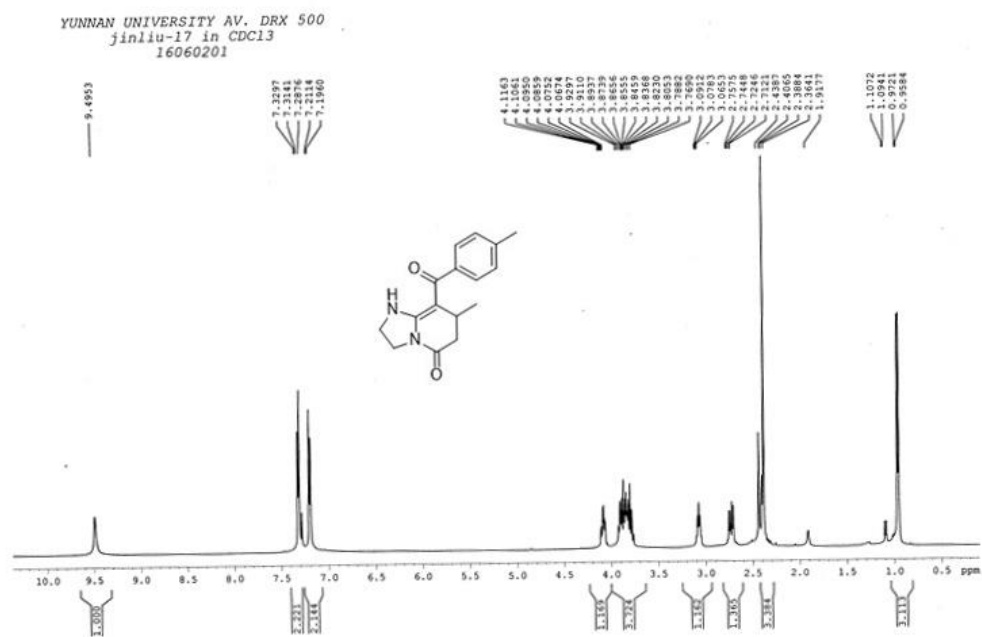

Figure 24a <sup>1</sup>H NMR (500 MHz, CDCl<sub>3</sub>) spectra of compound 5h

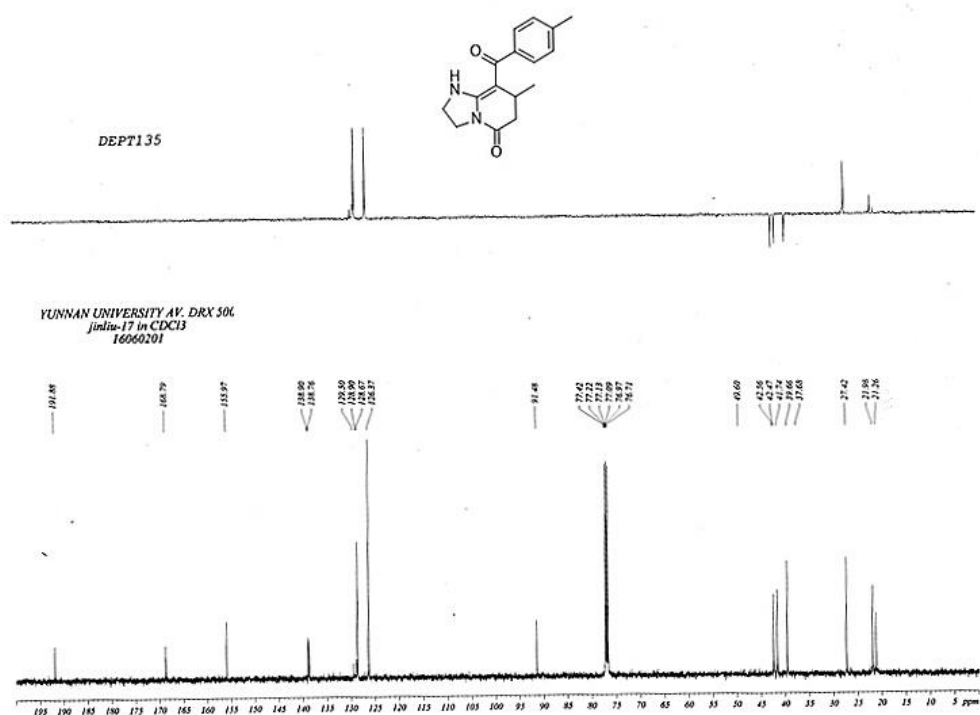

Figure 24b <sup>13</sup>C NMR (125 MHz, CDCl<sub>3</sub>) spectra of compound 5h

YUNNAN UNIVERSITY ASCEND AVIII 600  
JinLiu27 INCDCl3  
Jun14-2016-LJ07

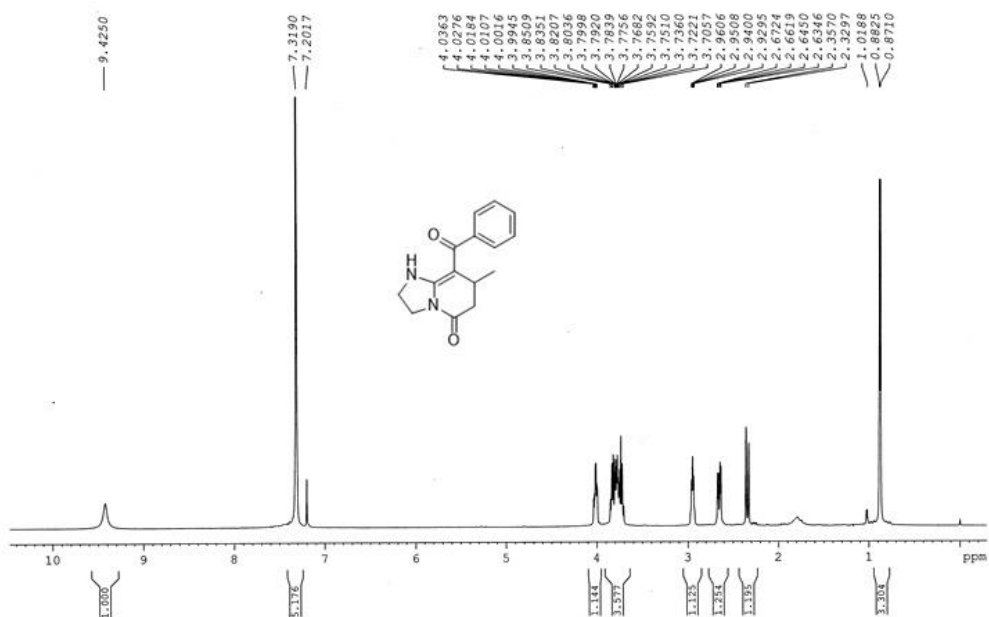

Figure 25a <sup>1</sup>H NMR (600 MHz, CDCl<sub>3</sub>) spectra of compound **5i**

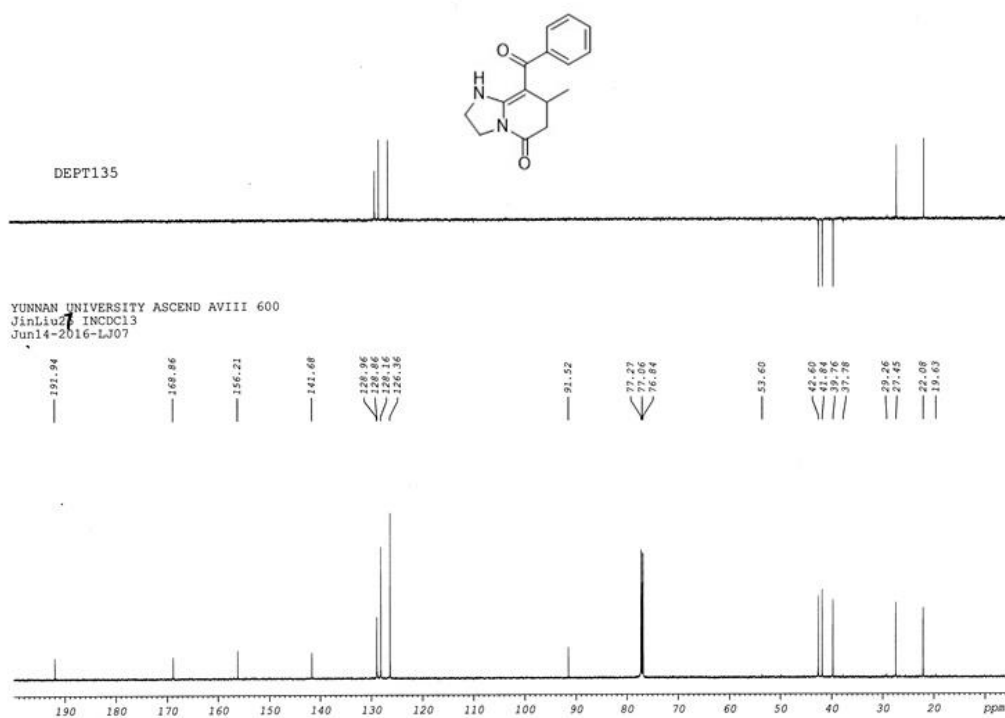

Figure 25b <sup>13</sup>C NMR (150 MHz, CDCl<sub>3</sub>) spectra of compound **5i**

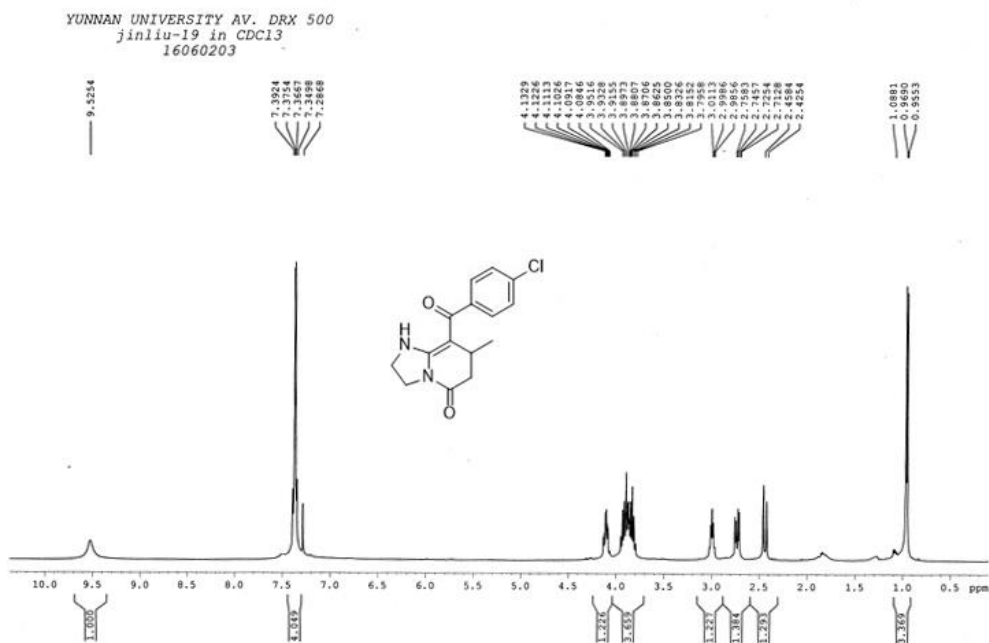

Figure 26a <sup>1</sup>H NMR (500 MHz, CDCl<sub>3</sub>) spectra of compound **5j**

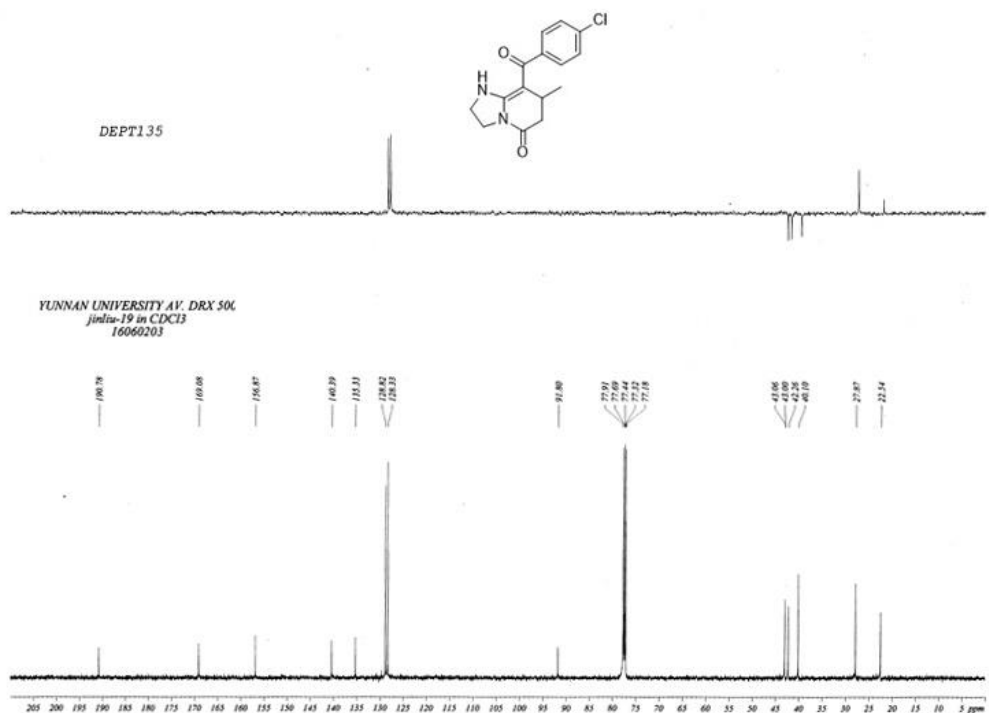

Figure 26b <sup>13</sup>C NMR (125 MHz, CDCl<sub>3</sub>) spectra of compound **5j**

YUNNAN UNIVERSITY ASCEND AVIII 600  
JinLiu26 INCDCl3  
Jun14-2016-LJ04

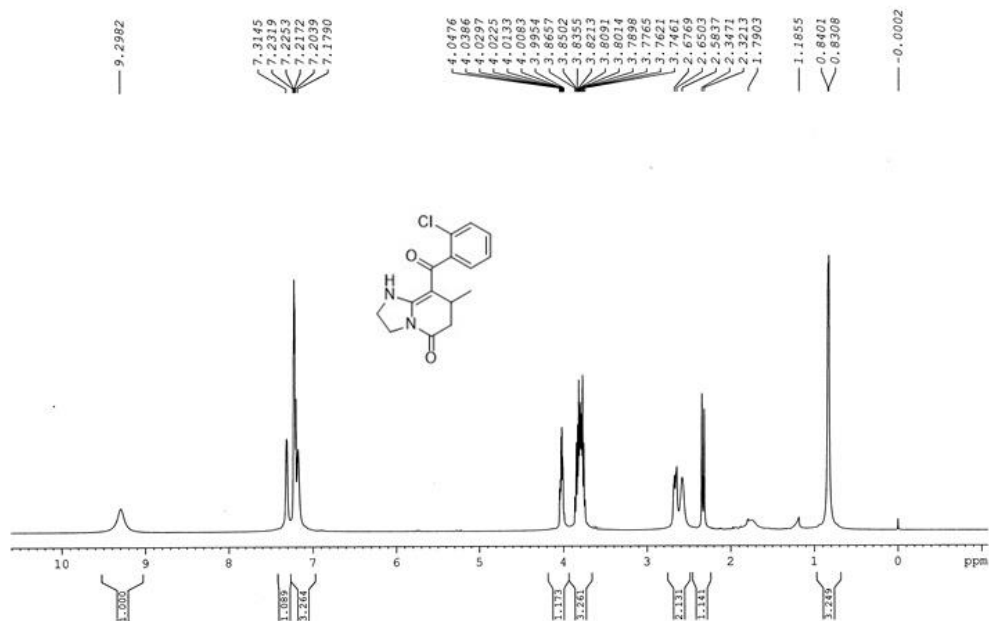

Figure 27a <sup>1</sup>H NMR (600 MHz, CDCl<sub>3</sub>) spectra of compound **5k**

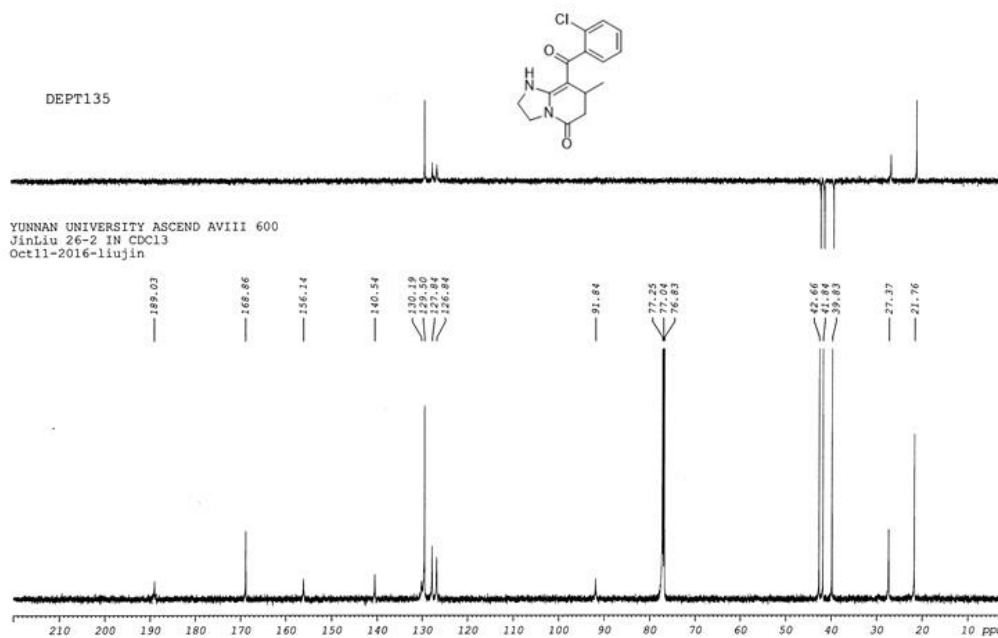

Figure 27b <sup>13</sup>C NMR (150 MHz, CDCl<sub>3</sub>) spectra of compound **5k**



# <sup>1</sup>H NMR and <sup>13</sup>C NMR spectra for bicyclic pyridones 6

YUNNAN UNIVERSITY ASCEND AVIII 600  
JinLiu25 INCDCl3  
Jun14-2016-LJ01

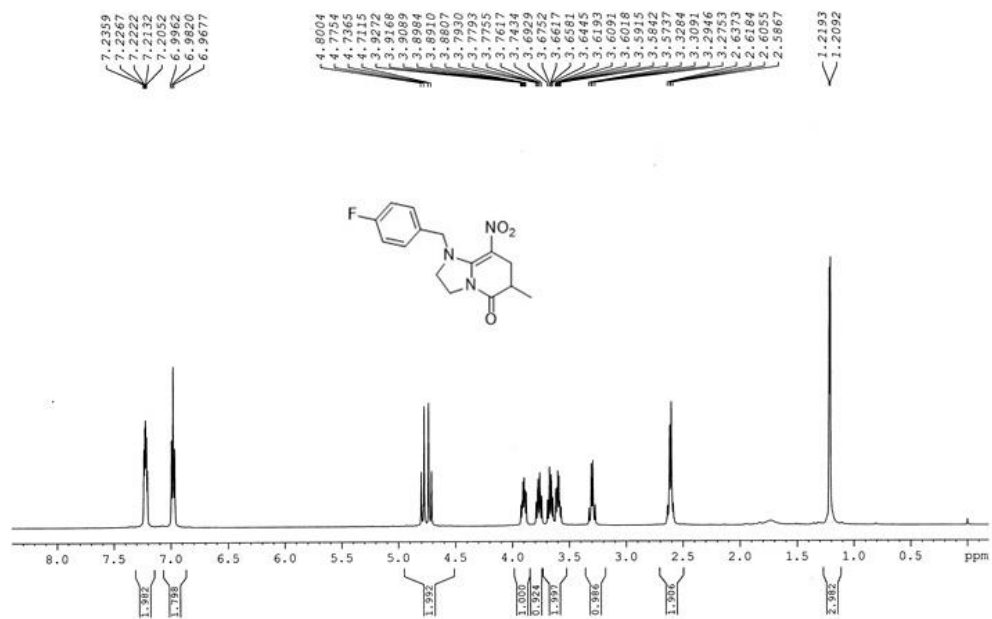

Figure 29a <sup>1</sup>H NMR (600 MHz, CDCl<sub>3</sub>) spectra of compound 6a

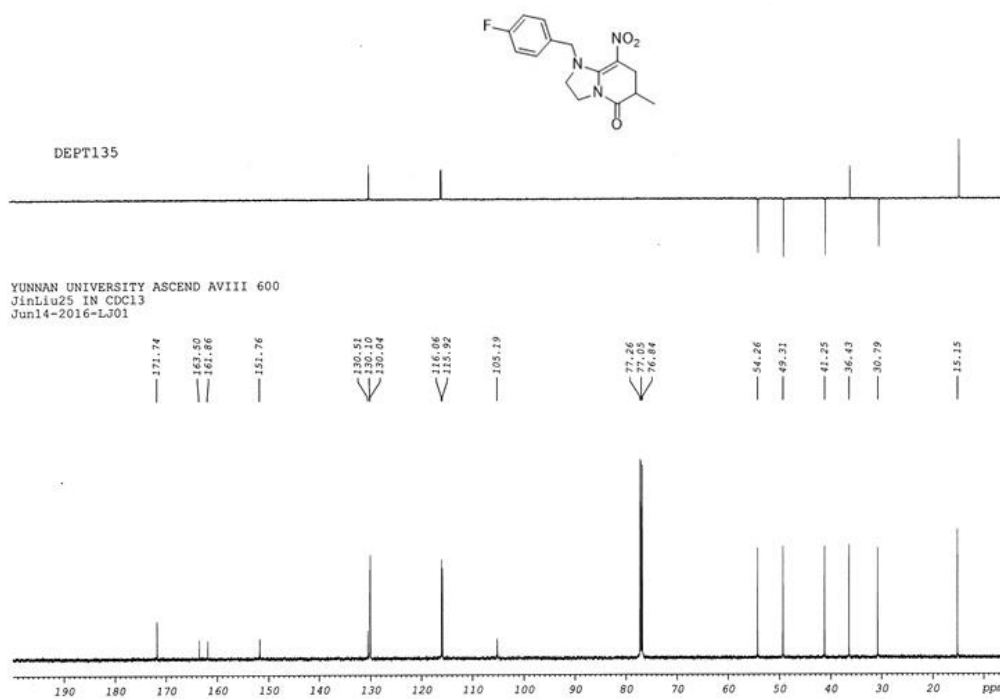

Figure 29b <sup>13</sup>C NMR (150 MHz, CDCl<sub>3</sub>) spectra of compound 6a

YUNNAN UNIVERSITY ASCEND AVIII 600  
 JinLiu-36 in CDCl<sub>3</sub>  
 Jun20-2016-LJ07

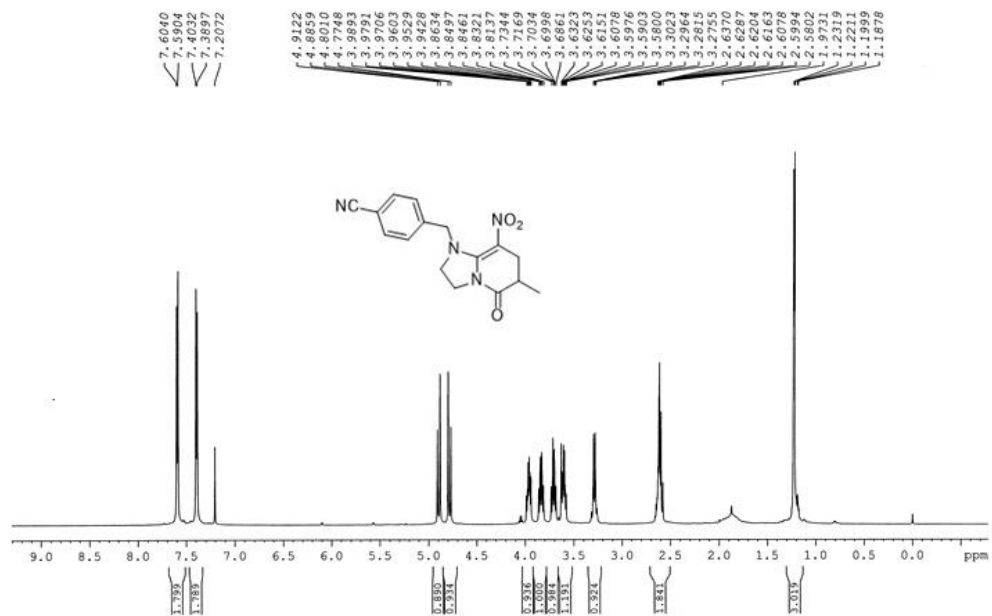

Figure 30a <sup>1</sup>H NMR (600 MHz, CDCl<sub>3</sub>) spectra of compound **6b**

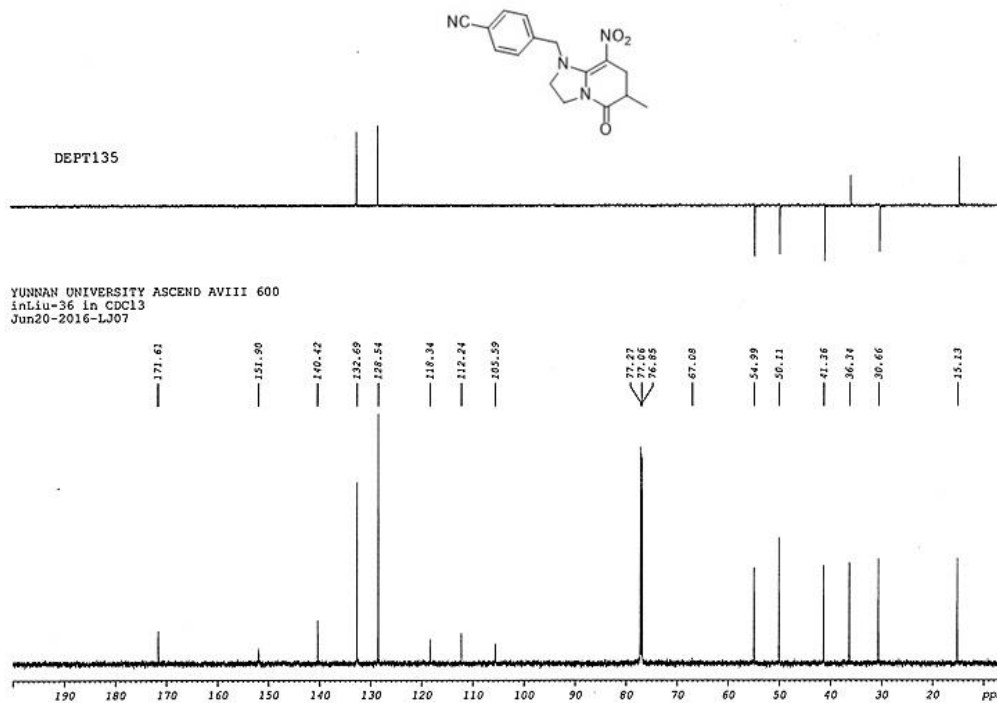

Figure 30b <sup>13</sup>C NMR (150 MHz, CDCl<sub>3</sub>) spectra of compound **6b**

YUNNAN UNIVERSITY AVIII 500  
JinLiu-35-5 in CDCl<sub>3</sub>  
Oct17-2016-liujin

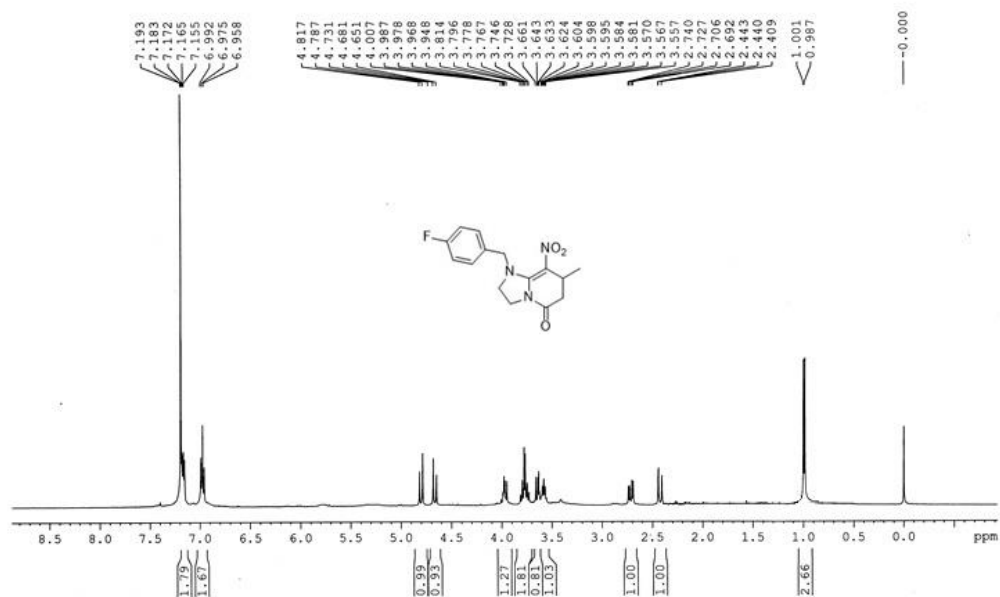

Figure 31a <sup>1</sup>H NMR (500 MHz, CDCl<sub>3</sub>) spectra of compound 6c

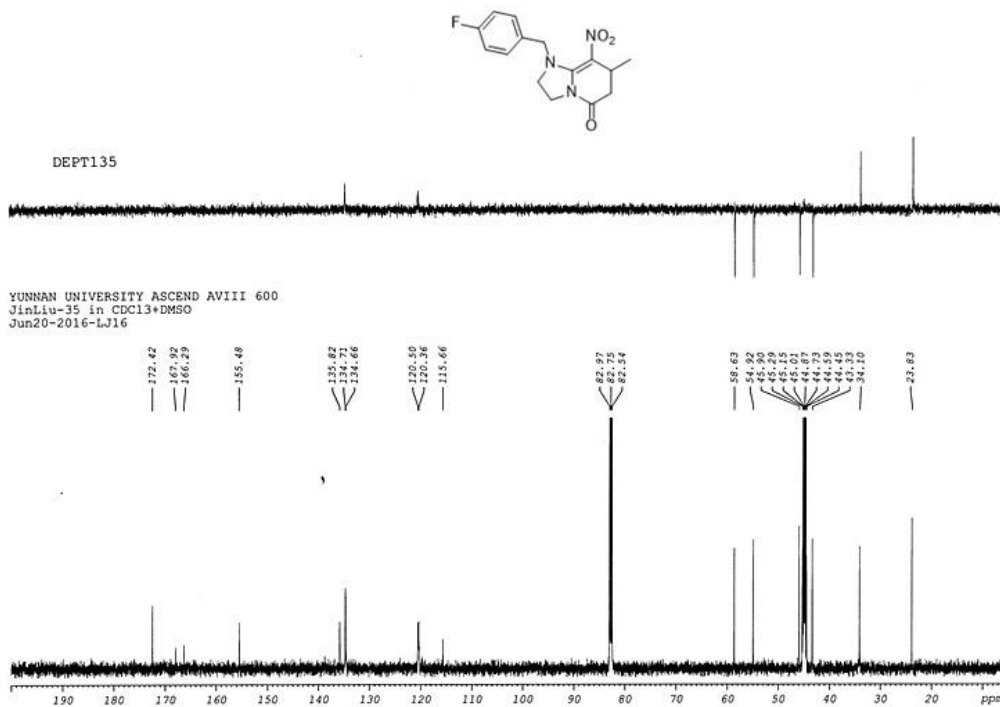

Figure 31b <sup>13</sup>C NMR (150 MHz, DMSO-*d*<sub>6</sub>+CDCl<sub>3</sub>) spectra of compound 6c



YUNNAN UNIVERSITY ASCEND AVIII 600  
 JinLiu-37 in CDCl<sub>3</sub>  
 Jun20-2016-LJ10

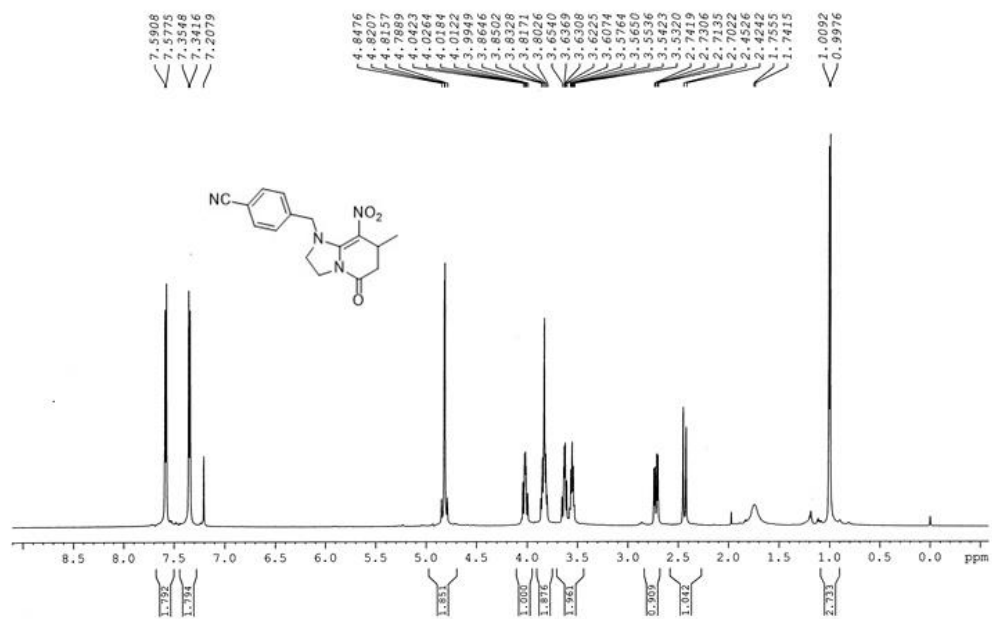

Figure 32a <sup>1</sup>H NMR (600 MHz, CDCl<sub>3</sub>) spectra of compound 6d

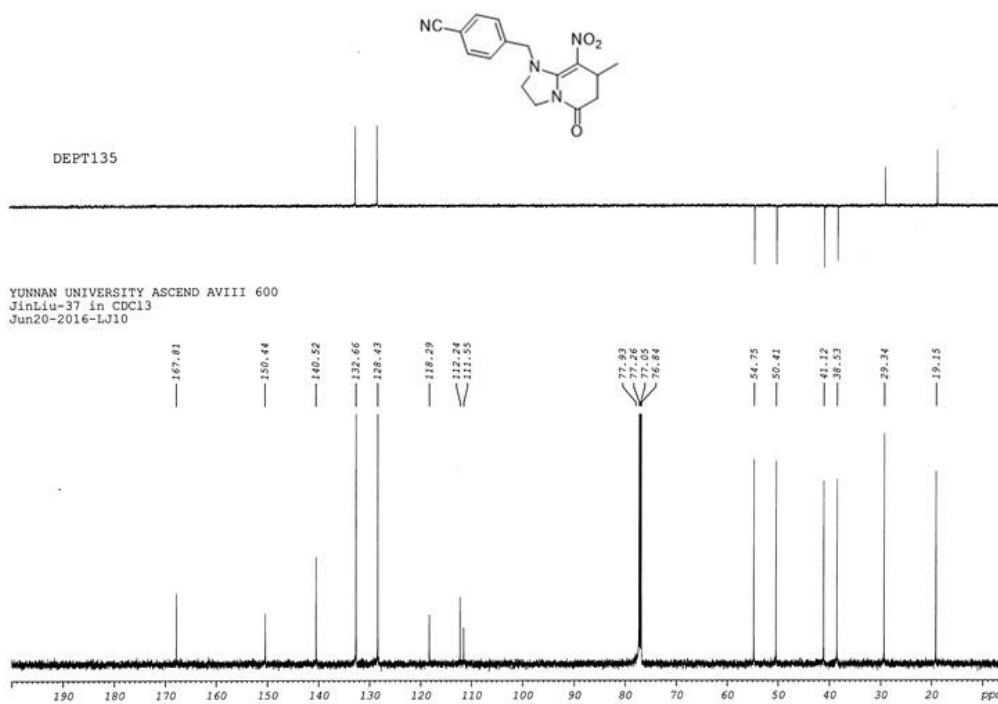

Figure 32b <sup>13</sup>C NMR (150 MHz, CDCl<sub>3</sub>) spectra of compound 6d

### References

- 1 (a) Z.-T. Huang and M.-X. Wang, *Synthesis*, 1992, **12**, 1273; (b) Z.-J. Li, and D. Charles, *Synth. Commun.*, 2001, **31**, 527.
- 2 Y.-F. Fan, S. Liu, N.-Y. Chen, X.-S. Shao, X.-Y. Xu and Z. Li, *Synlett*, 2015, **26**, 393.
